# Supplementary material for: A Comprehensive Study on Molecular Characteristics and Clinical Prognosis of Immune- Related Genes in Idiopathic Pulmonary Fibrosis
Source: Research Square preprint supplement (doi:10.21203/rs.3.rs-7616111/v1), 2025-10-30
Supplement: Supplementary file 1 [file 25fd28849ab0e9c43fdcb961.xlsx]

## Sheet: Sheet1
id	HR	HR.95L	HR.95H	pvalue
LGMN	41.0022	6.891	243.967	4.47904e-05
HAMP	13.0051	3.88283	43.5593	3.18868e-05
PI3	10.1498	3.63966	28.3044	9.47117e-06
CAMP	0.0714997	0.0116992	0.43697	0.00428525
PPBP	5.17696	1.35062	19.8434	0.0164671
CXCL14	4.55277	2.37668	8.72127	4.87195e-06
CCL13	12.993	2.78308	60.6587	0.00110657
DEFA3	3.45042	1.88152	6.32755	6.25765e-05
S100A12	9.62253	4.18677	22.1156	9.68787e-08
SFTPD	4.7672	1.93459	11.7473	0.000688618
MMP9	8.59986	2.69742	27.4179	0.000275438
SLC40A1	7.79299	2.22578	27.2851	0.00132094
SFTPA2	21.8124	2.71099	175.501	0.00376277
MPO	4.69958	2.02948	10.8826	0.000303828
RNASE3	14.7765	3.27319	66.7066	0.000462014
CCR3	3.15022	1.46155	6.78997	0.00340611
CCL2	73.947	13.7938	396.422	5.0848e-07
CCL7	13.8934	5.42919	35.5533	4.04493e-08
RNASE2	18.7008	4.08367	85.6387	0.000161721
FCGR2B	35.4283	3.57349	351.242	0.00230309
CMKLR1	85.3918	12.699	574.2	4.78922e-06
ADM	44.8244	13.1398	152.911	1.24878e-09
AREG	3.90974	1.54675	9.88274	0.00395398
FAM3B	0.123329	0.037662	0.403855	0.000543989
IGF1	0.258071	0.124572	0.534635	0.000267429
IL1RN	61.2383	1.65977	2259.43	0.0254043
NRG1	3.08783	1.66805	5.71607	0.000332678
PDGFD	0.504282	0.286377	0.88799	0.017718
SPP1	16.2286	4.49425	58.6013	2.10029e-05
ANGPTL4	3.9118	1.87212	8.17371	0.000285899
IL1R2	7.88223	3.59677	17.2737	2.50061e-07
PTGER3	0.518467	0.299374	0.8979	0.0190618
TUBB3	6.33106	3.00489	13.339	1.21221e-06
ICOS	0.0820242	0.027122	0.248063	9.47027e-06
