# Supplementary material for: A Comprehensive Study on Molecular Characteristics and Clinical Prognosis of Immune- Related Genes in Idiopathic Pulmonary Fibrosis
Source: Research Square preprint supplement (doi:10.21203/rs.3.rs-7616111/v1), 2025-10-30
Supplement: Supplementary file 2 [file 34160b0dd05e7fc17eb8d72a.xlsx]

## Sheet: Sheet1
id	GSM1820719	GSM1820720	GSM1820721	GSM1820722	GSM1820723	GSM1820724	GSM1820725	GSM1820726	GSM1820727	GSM1820728	GSM1820729	GSM1820730	GSM1820731	GSM1820732	GSM1820733	GSM1820734	GSM1820735	GSM1820736	GSM1820737	GSM1820738	GSM1820739	GSM1820740	GSM1820741	GSM1820742	GSM1820743	GSM1820744	GSM1820745	GSM1820746	GSM1820747	GSM1820748	GSM1820749	GSM1820750	GSM1820751	GSM1820752	GSM1820753	GSM1820754	GSM1820755	GSM1820756	GSM1820757	GSM1820758	GSM1820759	GSM1820760	GSM1820761	GSM1820762	GSM1820763	GSM1820764	GSM1820765	GSM1820766	GSM1820767
Activated B cell	0.140846	0.113407	0.155629	0.155067	0.164983	0.116335	0.109012	0.1544	0.107178	0.162194	0.144228	0.224075	0.174252	0.208288	0.15663	0.131934	0.192009	0.205497	0.147698	0.211009	0.183557	0.0247369	0.159077	0.113488	0.187716	0.158922	0.146031	0.103537	0.163591	0.14999	0.126573	0.118633	0.167665	0.131576	0.191877	0.115619	0.107611	0.100826	0.191351	0.132798	0.0782885	0.176247	0.133989	0.123569	0.109471	0.175457	0.195585	0.131292	0.224
Activated CD4 T cell	0.301352	0.371899	0.439812	0.540117	0.429199	0.41456	0.327248	0.436669	0.402287	0.503965	0.44189	0.520014	0.462816	0.557073	0.421361	0.468454	0.484315	0.47074	0.445027	0.486107	0.35668	0.356303	0.452984	0.428631	0.535967	0.428602	0.481334	0.340025	0.489088	0.40805	0.384583	0.418263	0.52381	0.424401	0.502973	0.405975	0.423673	0.40113	0.46342	0.403403	0.416087	0.460472	0.440569	0.406903	0.332633	0.518594	0.406449	0.41929	0.483575
Activated CD8 T cell	0.610359	0.59336	0.662083	0.733609	0.68633	0.563626	0.581821	0.720462	0.563566	0.700611	0.689898	0.769366	0.679522	0.806613	0.630801	0.654767	0.723229	0.73503	0.688372	0.721961	0.524697	0.549728	0.655441	0.611809	0.708861	0.650633	0.738427	0.599749	0.672634	0.667561	0.55971	0.582794	0.771033	0.59944	0.748795	0.593648	0.674605	0.595687	0.747464	0.549656	0.467835	0.658767	0.632814	0.595919	0.554613	0.808004	0.640836	0.652007	0.738709
Activated dendritic cell	0.717022	0.737706	0.749492	0.727919	0.747143	0.712006	0.733249	0.760505	0.724604	0.743044	0.800196	0.778611	0.758779	0.755847	0.72476	0.761492	0.766268	0.723889	0.75508	0.775272	0.702045	0.705623	0.724688	0.768903	0.776066	0.724693	0.72331	0.727362	0.741521	0.789805	0.743195	0.697504	0.767441	0.726942	0.752936	0.739108	0.710203	0.724408	0.755422	0.758774	0.708896	0.757407	0.764435	0.75132	0.713122	0.780725	0.730847	0.739367	0.706528
CD56bright natural killer cell	0.573007	0.59032	0.579319	0.59474	0.586052	0.579474	0.555093	0.572559	0.559702	0.595456	0.614485	0.602052	0.603018	0.624726	0.597734	0.586599	0.591577	0.592035	0.605682	0.589577	0.569098	0.571915	0.58862	0.590602	0.596853	0.608532	0.596592	0.589647	0.610074	0.623256	0.60208	0.556668	0.610607	0.597075	0.596304	0.570553	0.559708	0.6017	0.618374	0.558666	0.580604	0.580885	0.597527	0.618105	0.565993	0.630362	0.593384	0.609815	0.592683
CD56dim natural killer cell	0.691963	0.627029	0.630067	0.609587	0.610075	0.586236	0.605477	0.614765	0.598701	0.627102	0.639038	0.626119	0.628533	0.656259	0.635908	0.613191	0.634889	0.626601	0.632091	0.622433	0.622764	0.622102	0.619807	0.661281	0.632858	0.62813	0.638229	0.62126	0.61738	0.661228	0.634223	0.624673	0.660379	0.633689	0.656175	0.602834	0.638771	0.656573	0.639608	0.635518	0.600334	0.616583	0.665697	0.653213	0.646919	0.677392	0.662313	0.646103	0.643072
Eosinophil	0.311877	0.376308	0.361499	0.450451	0.354425	0.377615	0.293018	0.354639	0.325642	0.386925	0.387304	0.362303	0.345726	0.456987	0.363513	0.355948	0.417971	0.426147	0.360078	0.439639	0.434851	0.372544	0.434572	0.464986	0.450049	0.381908	0.415941	0.351756	0.376756	0.396024	0.353538	0.3508	0.471747	0.425253	0.444998	0.382247	0.383199	0.339412	0.445949	0.441258	0.392534	0.478534	0.468242	0.396961	0.364691	0.413253	0.39981	0.431431	0.427059
Gamma delta T cell	0.695076	0.736159	0.707607	0.725584	0.674129	0.651896	0.673826	0.685336	0.667385	0.697019	0.729861	0.705273	0.709361	0.704505	0.718147	0.71156	0.683005	0.664841	0.69555	0.68571	0.68721	0.703629	0.694057	0.746153	0.712692	0.72543	0.691921	0.717195	0.725501	0.732929	0.693881	0.705455	0.696468	0.673754	0.70598	0.696252	0.685897	0.714927	0.696628	0.706571	0.696668	0.684327	0.714424	0.710739	0.694077	0.712072	0.736525	0.706858	0.704226
Immature B cell	0.553326	0.552842	0.589286	0.547977	0.593783	0.566051	0.564801	0.596149	0.569916	0.583639	0.557479	0.594738	0.582396	0.588402	0.573394	0.590452	0.597108	0.610784	0.581988	0.606382	0.575069	0.560287	0.579472	0.56782	0.571772	0.561695	0.564732	0.572185	0.554743	0.572806	0.550236	0.53899	0.571579	0.560457	0.58589	0.569015	0.556494	0.545478	0.583636	0.583528	0.55355	0.580376	0.577069	0.552304	0.590139	0.590791	0.565339	0.548146	0.551782
Immature dendritic cell	0.70032	0.730072	0.724882	0.681516	0.706767	0.703645	0.730511	0.707276	0.715111	0.704239	0.743928	0.708178	0.716263	0.707442	0.727872	0.719874	0.72141	0.702468	0.728269	0.711234	0.730303	0.703016	0.742808	0.742261	0.746886	0.737228	0.745219	0.708951	0.73438	0.717425	0.719523	0.727559	0.704812	0.720246	0.708238	0.722676	0.722656	0.710264	0.720589	0.709166	0.709476	0.728972	0.758311	0.730666	0.709529	0.701203	0.710609	0.730859	0.733701
MDSC	0.933405	0.935419	0.928374	0.891157	0.908544	0.906938	0.895174	0.90309	0.920416	0.931886	0.944061	0.952363	0.951333	0.956783	0.942537	0.935707	0.945542	0.944117	0.953389	0.952677	0.946062	0.926783	0.919777	0.957164	0.972248	0.944726	0.956009	0.950696	0.937708	0.964956	0.94506	0.910303	0.974663	0.939443	0.983991	0.929702	0.949146	0.94542	0.966246	0.949916	0.930979	0.923469	1	0.97073	0.950955	0.998229	0.977921	0.957142	0.957155
Macrophage	0.503824	0.529842	0.528036	0.529605	0.519326	0.482529	0.469871	0.47406	0.498261	0.487374	0.506154	0.509066	0.513357	0.541543	0.549299	0.531607	0.529509	0.476942	0.507901	0.53449	0.52865	0.603756	0.554014	0.634453	0.556251	0.542243	0.511693	0.520719	0.542658	0.575667	0.512033	0.524888	0.518475	0.496798	0.54563	0.516937	0.54141	0.565581	0.526766	0.559149	0.532152	0.564438	0.5627	0.550038	0.523918	0.52692	0.551157	0.551895	0.546762
Mast cell	0.458259	0.521109	0.473175	0.456717	0.52793	0.488291	0.481128	0.414749	0.442436	0.456094	0.51607	0.462805	0.472237	0.540366	0.509657	0.499496	0.507395	0.509002	0.489742	0.513371	0.591276	0.50878	0.57598	0.606172	0.557116	0.519638	0.598219	0.510972	0.540959	0.534829	0.502253	0.528834	0.544883	0.535332	0.542308	0.532662	0.559535	0.52796	0.587517	0.570173	0.567347	0.613633	0.586749	0.538586	0.539521	0.547556	0.576909	0.599101	0.577216
Monocyte	0.819788	0.801505	0.795487	0.757932	0.78073	0.785972	0.79139	0.775469	0.790975	0.801053	0.800913	0.799125	0.799139	0.812804	0.812678	0.800235	0.79962	0.815787	0.809234	0.807701	0.805941	0.797896	0.810544	0.819281	0.815711	0.81667	0.806607	0.800578	0.801488	0.807219	0.799539	0.780194	0.812113	0.823088	0.823503	0.800148	0.790403	0.805455	0.814106	0.779881	0.79426	0.805771	0.832324	0.819857	0.800304	0.799906	0.831358	0.811818	0.808391
Natural killer T cell	0.509641	0.515671	0.544282	0.55642	0.542713	0.488926	0.510962	0.535236	0.525311	0.528662	0.523285	0.552602	0.541222	0.574096	0.510767	0.527595	0.543238	0.531764	0.534907	0.549603	0.508201	0.499451	0.534078	0.53768	0.535887	0.54872	0.534618	0.519055	0.547694	0.534467	0.500425	0.516079	0.533115	0.52459	0.548415	0.539473	0.536091	0.507663	0.553635	0.524014	0.529134	0.514717	0.54013	0.528336	0.515436	0.555489	0.532288	0.537639	0.537945
Natural killer cell	0.548519	0.552414	0.558585	0.560068	0.537377	0.565875	0.535278	0.56181	0.563912	0.562949	0.566642	0.584243	0.563106	0.578214	0.564628	0.56607	0.556408	0.566243	0.559919	0.553583	0.561153	0.561863	0.582999	0.595193	0.570196	0.564505	0.573924	0.561446	0.562001	0.563896	0.569511	0.566936	0.568263	0.57652	0.594642	0.552293	0.556338	0.549644	0.571448	0.529489	0.556261	0.574373	0.577966	0.586478	0.545051	0.572728	0.558652	0.547771	0.579644
Neutrophil	0.169949	0.212677	0.299131	0.216473	0.173036	0.220348	0.133296	0.166538	0.238148	0.188242	0.221778	0.281038	0.259285	0.200591	0.205889	0.254218	0.230328	0.127301	0.250511	0.295566	0.260022	0.134801	0.276508	0.538236	0.253091	0.250851	0.230464	0.225836	0.19143	0.324745	0.323026	0.179929	0.231322	0.157665	0.348895	0.182338	0.218024	0.311933	0.272604	0.250052	0.176619	0.185675	0.498728	0.399477	0.242961	0.376549	0.345474	0.400278	0.308683
Plasmacytoid dendritic cell	0.788309	0.797771	0.835521	0.802436	0.820911	0.813356	0.831885	0.829024	0.839021	0.815223	0.846286	0.819896	0.816637	0.799801	0.808745	0.818124	0.815747	0.815299	0.805396	0.819925	0.800111	0.806624	0.812559	0.851204	0.798567	0.808692	0.791394	0.809121	0.80188	0.807748	0.811308	0.808188	0.783255	0.812913	0.811676	0.814383	0.779489	0.826031	0.801327	0.802171	0.791862	0.798751	0.835632	0.831043	0.796048	0.819407	0.794473	0.81962	0.793143
Regulatory T cell	0.543586	0.575274	0.604221	0.588374	0.559946	0.525192	0.544178	0.553074	0.569491	0.555111	0.599834	0.602887	0.580802	0.617555	0.581594	0.578634	0.58136	0.563755	0.572822	0.609249	0.543477	0.581587	0.561442	0.618868	0.604774	0.589574	0.597265	0.569269	0.602835	0.601133	0.57748	0.560688	0.547488	0.59628	0.603226	0.578119	0.537341	0.566319	0.602354	0.614748	0.611667	0.55569	0.614395	0.58927	0.555358	0.605883	0.559831	0.555003	0.57503
T follicular helper cell	0.546698	0.600396	0.575731	0.573847	0.569132	0.538803	0.553858	0.559558	0.548287	0.569833	0.5789	0.597186	0.588061	0.629735	0.56802	0.568036	0.591237	0.576008	0.566382	0.577289	0.540302	0.537999	0.567084	0.595444	0.593241	0.56611	0.578759	0.556675	0.584674	0.592039	0.545737	0.548954	0.589578	0.541442	0.587387	0.547853	0.56942	0.567339	0.588525	0.569718	0.549602	0.57911	0.589764	0.572954	0.538578	0.605408	0.572943	0.571775	0.602525
Type 1 T helper cell	0.50023	0.506491	0.522355	0.5303	0.515265	0.481795	0.487824	0.50647	0.479906	0.519623	0.527613	0.546953	0.517912	0.558134	0.503682	0.512763	0.538242	0.536413	0.524494	0.525568	0.495932	0.482593	0.511644	0.522467	0.531377	0.513297	0.513615	0.493567	0.513097	0.533442	0.492643	0.488641	0.556475	0.500562	0.534102	0.501141	0.502876	0.498978	0.527565	0.497085	0.471087	0.519079	0.517188	0.501326	0.509634	0.553291	0.522857	0.499075	0.529242
Type 17 T helper cell	0.327641	0.306778	0.316771	0.310936	0.304698	0.280101	0.297386	0.316334	0.308872	0.326826	0.319909	0.330026	0.330116	0.315334	0.302852	0.302157	0.315083	0.285948	0.302782	0.322576	0.251144	0.258141	0.27403	0.274721	0.287349	0.333568	0.251234	0.282364	0.299759	0.322449	0.302035	0.297603	0.298809	0.278107	0.303794	0.293126	0.245508	0.273725	0.273329	0.277593	0.277651	0.240922	0.275611	0.31816	0.287158	0.318649	0.281817	0.255086	0.276046
Type 2 T helper cell	0.279831	0.329054	0.351939	0.410353	0.351534	0.315648	0.295798	0.337693	0.314489	0.361205	0.316967	0.376619	0.358999	0.396604	0.335201	0.368352	0.324442	0.338959	0.331839	0.314097	0.29459	0.313395	0.367084	0.321228	0.382526	0.36649	0.360898	0.295336	0.387245	0.341185	0.327305	0.37681	0.336585	0.327846	0.367318	0.315755	0.337122	0.324505	0.354019	0.340444	0.326061	0.32899	0.320501	0.331671	0.306491	0.348769	0.358781	0.350426	0.365453
[truncated: 147 more columns]
