# Supplementary material for: A Comprehensive Study on Molecular Characteristics and Clinical Prognosis of Immune- Related Genes in Idiopathic Pulmonary Fibrosis
Source: Research Square preprint supplement (doi:10.21203/rs.3.rs-7616111/v1), 2025-10-30
Supplement: Supplementary file 3 [file 3a6baab5fce567db3f4a8c81.xlsx]

## Sheet: Sheet1
DEG		IRGs
TNN		AZGP1
LRRC4		B2M
SNAR-B1		CALR
MXRA8		CANX
LOC100134285		CD1A
MPPED1		CD1B
PNMAL1		CD1C
RNF180		CD1D
CDKN2B		CD1E
TBX3		CD4
ZFP57		CD8A
NRN1		CD8B
SCML4		CD74
C22orf24		CREB1
LOC440330		CTSB
RALYL		CTSE
CLTC		CTSL
FAM55A		CTSS
LOC100128682		FCER1G
C20orf151		FCGRT
OR10A7		PDIA3
NAG20		HFE
C19orf77		HLA-A
OR2G2		HLA-B
MDFI		HLA-C
FLJ45079		HLA-DMA
HILS1		HLA-DMB
LOC401180		HLA-DOA
SOX2		HLA-DOB
ALX1		HLA-DPA1
OR4C6		HLA-DPB1
GNG11		HLA-DQA1
SV2B		HLA-DQA2
OR4F21		HLA-DQB1
EMID1		HLA-DRA
GATA2		HLA-DRB1
LOC283731		HLA-DRB3
C2orf40		HLA-DRB4
OR2A12		HLA-DRB5
C20orf85		HLA-E
SERPINB3		HLA-F
HBA2		HLA-G
UBD		HLA-H
DPP4		MR1
CALCA		HSPA1A
APLNR		HSPA1B
KRT80		HSPA1L
DNAH12		HSPA2
OR2D3		HSPA4
CHST15		HSPA5
FZD9		HSPA6
PIGR		HSPA8
SPEN		HSP90AA1
G0S2		HSP90AB1
HBB		ICAM1
REP15		IFNA1
IKZF3		IFNA2
SCN3A		IFNA4
COL1A1		IFNA5
ZNF831		IFNA6
PDZK1IP1		IFNA7
ALPL		IFNA8
LRIT1		IFNA10
FAM71F1		IFNA13
FGF3		IFNA14
PDGFD		IFNA16
EFNA5		IFNA17
IFNG		IFNA21
ANKRD33B		IFNG
CEACAM6		KIR2DL1
MIAT		KIR2DL2
IL8		KIR2DL3
SLC6A13		KIR2DL4
NRG1		KIR2DS1
SERPINB4		KIR2DS3
CXCL9		KIR2DS4
CLGN		KIR2DS5
CLDN18		KIR3DL1
FOLR3		KIR3DL2
MGP		KLRC1
HBD		KLRC2
TFPI		KLRC3
C9orf171		KLRD1
PCSK9		LTA
MMP9		CIITA
SEC14L2		MICA
LOC100132368		MICB
AREG		NFYA
LOC283392		NFYB
NIPAL4		NFYC
DSP		LGMN
CD24		PSMB8
KLRB1		PSMC1
CAPN11		PSMC2
KIAA0125		PSMC3
CSPG4		PSMC4
TAAR2		PSMC5
KRT17		PSMC6
PAX6		PSMD1
TRAT1		PSMD2
LOC283050		PSMD3
WNT2B		PSMD4
WIF1		PSMD5
CYR61		PSMD7
XCL1		PSMD8
AQP2		PSMD10
TMEM130		PSMD11
LOC729040		PSMD13
C14orf162		PSME1
KIAA0408		PSME1
PI3		PSME2
SYNE2		PSME2
OR52E8		RELB
NDN		RFX5
MS4A2		RFXAP
FBXL16		SLC10A2
OR8G5		TAP1
CLC		TAP2
CEACAM7		TAPBP
CYP4F8		THBS1
FAM183B		SEM1
HRK		KLRC4
MAL		AP3B1
GSTA5		RFXANK
FAM3B		PSMD6
PRSS8		PSME3
S1PR3		PSMD14
SFN		CLEC4M
SFTPD		IFI30
CCL26		PROCR
SNTN		ADRM1
MUC1		ECPAS
FAM183A		TRPC4AP
GPR182		CD209
HAMP		UBXN1
IGF1		ERAP1
HS3ST2		TAPBPL
TNFRSF25		KIR2DL5A
SPTLC3		ERAP2
SLC40A1		ULBP3
AANAT		ULBP2
CD40LG		ULBP1
PRKAR1B		KIR3DL3
MRVI1		RAET1E
EHD2		RAET1L
DLEC1		UBR1
DNAI2		RAET1G
C1orf111		PDIA2
DEFA3		HAMP
FAM70A		PI3
KRT14		CAMP
STEAP4		DEFB4A
C1orf194		PPBP
SLC24A3		REG3G
ACSS3		CXCL14
MUC21		CXCL16
ATP9A		SLPI
ANK3		CXCL8
GPT		CXCL10
ASPHD1		CXCL9
LRG1		CXCL5
DACH1		CXCL11
ZMAT3		CXCL6
KLK11		CXCL1
RPA4		CXCL12
AQP4		CXCL13
EHF		CXCL2
TPST1		PF4
KRTAP4-11		XCL1
KIT		CXCL3
ENPP5		DEFB103B
IBSP		CCL13
CXCL14		CCL1
DIRC3		DEFB1
DMD		CCL8
NRAP		ELANE
HIST2H3A		DEFB103A
EPO		DEFA3
IFT81		DEFA1
MGC14436		TMSB10
TPBG		DEFA6
PROM2		DEFA5
SLC7A2		DEFA4
LAMB1		LCN2
EPM2AIP1		LCN1
SERPINI2		COLEC10
LOC100131289		BPI
S100A12		S100A9
IL1R2		S100A8
FAM198B		DCD
MYO7B		LCN6
TMEM200A		S100A12
TM4SF19		HTN3
KCNG1		LCN8
C7orf58		DEFA1B
ITGB8		CCR10
LOC400891		CELA1
ENHO		DEFB106A
2025-09-04		PENK
LGMN		BPIFC
LARP6		MMP12
NT5DC2		BPIFB6
GAL3ST4		LEAP2
C9orf30-TMEFF1		SFTPD
C20orf46		LCN9
PTGER3		BPIFB2
CCL13		PTGDS
KLF12		TMSB4X
CXCL5		PGLYRP1
KRT79		ZC3HAV1
CHRM2		TMSB15A
BEX5		S100B
HDC		S100A13
DIRAS1		S100A6
PLEKHA6		DEFB119
CAPS2		DEFB107A
LEF1		DEFB105A
GPR179		SERPIND1
CDC42EP3		DEFB129
LOC100131089		DEFB127
TM4SF1		S100P
RSPH1		S100A7
IER3		DEFB104A
EPB41L4A		DEFB126
FGFR1		DEFB106B
MALL		DEFB104B
C10orf116		DEFB107B
CNIH3		PGLYRP3
CD86		PGLYRP2
HIST1H3B		S100A10
TC2N		S100A2
FAM20A		DEFB125
HES4		DEFB123
DNAH5		DEFB105B
ERN2		DEFB132
ADM		BPIFB3
FCER2		LCN12
FNDC5		PGLYRP4
GRIN3B		S100A11
LOC91450		S100A5
GABRE		S100A3
ICOS		S100A1
IQCA1		DEFB128
RFPL4A		DEFB108B
SEC16B		HTN1
CCL7		LMBR1L
FBXO15		S100A7A
MGC24103		DEFB118
SNAI1		COLEC12
SHROOM3		TMSB4Y
RGS2		DEFB131A
ABLIM3		DEFB134
CALB2		DEFB130A
TJP1		DEFB124
MAGI3		DEFB121
ODF3L1		DEFB116
RAP1GAP2		DEFB115
SNORA12		DEFB114
FAM124B		DEFB113
P2RY2		DEFB112
CCR3		DEFB110
CMKLR1		TMSB15B
MPO		DEFB133
VSTM1		S100Z
NHS		MAVS
COL22A1		TMSB4XP8
TRIB2		S100A14
DLX3		LCN10
SFTPA2		S100A16
GPRASP1		DEFB136
OR13H1		DEFB135
ECM1		DEFB117
PDCD1LG2		DEFB110
ARNT2		ZC3HAV1L
KCNAB1		S100A7L2
MAP9		MBL3P
ZNF404		DEFB4B
B3GNT8		BPIFB4
ZNF589		IFNAR1
LTC4S		AZU1
ACSM1		DEFB131B
LRRC2		DEFA1A3
LOC729867		LCN1P1
CES1		S100G
SEPP1		DEFA7P
BICC1		DEFB130B
LOC100270804		DEFB108F
SLC28A3		DEFB131C
SAMD12		TCHHL1
FLJ46875		TINAGL1
ZNF610		IFNGR1
RAB39B		SLC22A17
ANGPTL4		WFIKKN1
MFAP3L		WFDC2
RAB3IL1		IL6
RGL1		UMODL1
HS3ST1		TGFB1
TPSD1		PF4V1
CPA3		MMP9
LOC100128252		ANOS1
CDA		TLR4
SOD3		IFNG
LOC400043		SPAG11B
AKR1E2		A2M
SLC16A10		CTSL
CH25H		NFKB1
OR2A7		APOBEC3G
TDRD10		FABP6
CYP3A5		NOD2
MMP10		MBL2
COL9A2		SFTPA1
SNCA		RBP1
NBEA		TLR2
PRRT4		SLC40A1
SFTPC		PLAU
CACNA1G		IL1B
SH3RF1		PAEP
C17orf69		HJV
IL1RN		MUC5AC
PGA3		CTSS
GDA		OBP2A
SDS		PLTP
CCL2		MX1
ZBP1		DDX58
MURC		IFNL1
PID1		IRF3
SLC4A8		SFTPA2
ACOX2		LPA
FAM47E		LBP
OLIG1		RBP4
FCGR2B		SFTPA1
QPCT		NOX4
CPLX3		LTF
MERTK		IFNB1
UCK2		RBP5
FCN1		FABP7
SCN8A		FABP5
KPNA5		FABP3
F13A1		FABP2
TPSAB1		FABP4
TUBB3		R3HDML
EFCAB1		BPIFA3
FFAR3		BPIFB1
SPINK1		OASL
DLX4		CRABP2
MRC2		CRABP1
STAB1		RBP7
CYBRD1		DUOX1
ZFP14		OBP2B
VSNL1		RBP2
SLITRK4		LCN15
C8B		CETP
GBP7		FABP12
NRGN		FABP9
HTRA1		BPIFA1
RNASE3		LCNL1
RNASE1		C8G
LPAR3		SPAG11A
ARAP3		PI15
CYP1B1		NOX1
AOC3		PMP2
TIMP3		APOD
CXCR7		ORM2
RBM11		ORM1
LOC645206		TNF
VCAN		CTSG
SPRY2		PRTN3
SFTPB		MAPK1
ITIH5		PML
MYO1A		AEN
C14orf34		CYBB
CYP3A7		BPIFA2
ZNF251		ISG20
ZNF540		BCL3
CD36		ISG20L2
ARHGAP24		NOX5
NALCN		NOX3
HLF		DUOX2
MMP7		TLR3
TMEM56		TFRC
HOMER3		IFIH1
RNASE2		LRP1
PLA2G7		TRIM5
EMP1		IDO1
ZNF702P		GDF15
ENPP3		NEDD4
CST6		ADIPOQ
FABP3		STAT3
EPB41L5		STAT1
CAMP		IFNL2
MATK		SOCS3
TCEA3		SEMG1
ODZ4		TNFSF10
ITGB3		CCL20
GFRA2		SOCS1
TCF7L1		RNASEL
PPBP		IRF1
FAM125B		IL15
SPP1		APOBEC3F
CYTL1		PLAAT4
		CHIT1
		IFNA1
		CD40
		TLR7
		PPIA
		HFE
		ZYX
		NLRX1
		PGC
		VEGFA
		IKBKE
		ISG15
		DHX58
		TNFAIP3
		TFR2
		FCN2
		MUC4
		F2R
		ELN
		IL27
		MAPT
		LYZ
		CCL5
		LEP
		CYLD
		KLKB1
		CST4
		CSRP1
		MAPK14
		JUN
		ITGAV
		IRF5
		CCR6
		IL12B
		TLR8
		GNLY
		CD81
		EIF2AK2
		APOM
		CACYBP
		NOD1
		MAPK8
		MAPK3
		BST2
		BPHL
		PLA2G2A
		GRN
		NEWENTRY
		PDGFRA
		GNAI1
		WNT5A
		FURIN
		ADAR
		TYK2
		NOS2
		TRAF3
		TPT1
		TPM2
		NEO1
		AHNAK
		TLR1
		TK2
		PRDX2
		MX2
		FGF2
		FGA
		TCF7L2
		F2RL1
		TKFC
		MSR1
		NFKBIZ
		LMBR1
		EPPIN
		SRC
		MPO
		ELAVL1
		ROBO3
		SP1
		SOD1
		PDF
		DLL4
		ECD
		SLC11A1
		DMBT1
		STING1
		SKIV2L
		SEMG2
		LTA
		DES
		DCK
		DAXX
		TNFRSF10A
		TNFRSF10B
		EED
		CCL4
		LIMS1
		LALBA
		APOBEC3H
		TMPRSS6
		SPINK5
		MARCO
		BECN1
		TNFSF11
		KNG1
		CSK
		KLRK1
		KCNH2
		JUND
		JAK1
		CREB1
		CLDN4
		CCL28
		RNASE3
		RN7SL1
		IRF7
		IREB2
		ILK
		IL18
		IL17A
		LTB4R
		APOBEC3A
		MASP2
		TRIM27
		RELA
		IL7R
		IL1A
		PTX3
		IFNAR2
		IFN1@
		SYTL1
		APOBEC3C
		DDX17
		PTGS2
		HTR1A
		SEPTIN7
		CD40LG
		CD14
		CD8A
		CD4
		MASP1
		PROC
		MAP2K2
		MAP2K1
		HRG
		NDRG1
		IRF9
		TRIM22
		LANCL1
		PPP4C
		HMOX1
		HMGB1
		HLA-B
		RNASE7
		ABCC4
		HGF
		HDAC1
		IFNLR1
		PLSCR1
		B2M
		BACH2
		TANK
		PIK3CG
		ARRB1
		RSAD2
		STAB2
		TBK1
		PDYN
		PDGFRB
		PDCD1
		PCSK2
		PCSK1
		ARG2
		AQP9
		FASLG
		APOH
		BIRC5
		ANXA6
		IL22
		VTN
		VIM
		VCAM1
		PRDX1
		GFAP
		GBP2
		ALB
		SLC29A3
		OAS1
		AGER
		UNC93B1
		TNFSF4
		NOS1
		ACTG1
		ACTA1
		ACO1
		SERPINA3
		CXCR1
		CCL15
		CCL14
		CCL4
		CCL16
		CCL19
		CCL13
		CCL18
		CCL17
		CCL26
		CCL22
		CCR3
		CCL28
		CCL4L1
		ACKR2
		CCR7
		CCL27
		CCR8
		ACKR4
		CCR10
		CCL2
		CCL21
		CCL7
		CCL5
		CCL3
		CCL20
		CCL11
		CCR5
		CCL23
		CCL25
		CCL1
		CCL3L3
		CCL4L2
		CXCL12
		XCL1
		CCL8
		CCL3L1
		CCR1
		CCL24
		XCL2
		CXCL1
		CXCL10
		CXCR4
		CXCL2
		CXCR6
		CCR4
		CXCL11
		TAFA5
		TAFA3
		TAFA4
		TAFA1
		TAFA2
		CCL15-CCL14
		IL6
		TNF
		IL1B
		IL18
		PTK2B
		VEGFA
		IL4
		CDH1
		CD40
		DEFB103B
		F2RL1
		MMP9
		LTBP1
		DEFB4A
		TNFSF10
		IL13
		IL10
		IL2
		PPARG
		FGR
		MIF
		CRP
		JAK2
		IL1A
		PTK2
		PTGDR
		CD86
		HCK
		ARRB1
		GNAI1
		VDR
		OLR1
		GRK2
		TXK
		RNASE2
		CD79A
		CD79B
		LYN
		SYK
		BTK
		BLNK
		VAV3
		VAV1
		VAV2
		RAC1
		RAC2
		RAC3
		PPP3CA
		PPP3CB
		PPP3CC
		CHP1
		PPP3R1
		PPP3R2
		CHP2
		NFAT5
		NFATC1
		NFATC2
		NFATC3
		NFATC4
		HRAS
		KRAS
		NRAS
		FOS
		JUN
		CARD11
		BCL10
		MALT1
		CHUK
		IKBKB
		IKBKG
		NFKB1
		RELA
		NFKBIA
		NFKBIB
		NFKBIE
		CD81
		CD19
		CR2
		PIK3R5
		PIK3R1
		PIK3R2
		PIK3R3
		PIK3CA
		PIK3CB
		PIK3CD
		PIK3CG
		AKT3
		AKT1
		AKT2
		GSK3B
		INPP5D
		CD22
		CD72
		PTPN6
		LILRB3
		FCGR2B
		RASGRP3
		PLCG2
		PRKCB
		IFITM1
		IGH
		IGHA1
		IGHA2
		IGHD
		IGHD1-1
		IGHD1-14
		IGHD1-20
		IGHD1-26
		IGHD1-7
		IGHD2-15
		IGHD2-2
		IGHD2-21
		IGHD2-8
		IGHD3-10
		IGHD3-16
		IGHD3-22
		IGHD3-3
		IGHD3-9
		IGHD4-11
		IGHD4-17
		IGHD4-23
		IGHD4-4
		IGHD5-12
		IGHD5-18
		IGHD5-24
		IGHD5-5
		IGHD6-13
		IGHD6-19
		IGHD6-25
		IGHD6-6
		IGHD7-27
		IGHE
		IGHG1
		IGHG2
		IGHG3
		IGHG4
		IGHJ1
		IGHJ2
		IGHJ3
		IGHJ4
		IGHJ5
		IGHJ6
		IGHM
		IGH
		IGHV1-18
		IGHV1-2
		IGHV1-24
		IGHV1-3
		IGHV1-45
		IGHV1-46
		IGHV1-58
		IGHV1-69
		IGHV1-8
		IGHV1-38-4
		IGHV1-69-2
		IGHV2-26
		IGHV2-5
		IGHV2-70
		IGHV3-11
		IGHV3-13
		IGHV3-15
		IGHV3-16
		IGHV3-20
		IGHV3-21
		IGHV3-23
		IGHV3-30
		IGHV3-30-3
		IGHV3-30-5
		IGHV3-33
		IGHV3-35
		IGHV3-38
		IGHV3-43
		IGHV3-48
		IGHV3-49
		IGHV3-53
		IGHV3-64
		IGHV3-66
		IGHV3-7
		IGHV3-72
		IGHV3-73
		IGHV3-74
		IGHV3-9
		IGHV3-38-3
		IGHV3-69-1
		IGHV4-28
		IGHV4-30-1
		IGHV4-30-2
		IGHV4-30-4
		IGHV4-31
		IGHV4-34
		IGHV4-39
		IGHV4-4
		IGHV4-59
		IGHV4-61
		IGHV4-38-2
		IGHV5-51
		IGHV5-10-1
		IGHV6-1
		IGHV7-4-1
		IGHV7-81
		IGK
		IGKC
		IGKDEL
		IGKJ
		IGKJ1
		IGKJ2
		IGKJ3
		IGKJ4
		IGKJ5
		IGKV@
		IGKV1-12
		IGKV1-13
		IGKV1-16
		IGKV1-17
		IGKV1-27
		IGKV1-33
		IGKV1-37
		IGKV1-39
		IGKV1-5
		IGKV1-6
		IGKV1-8
		IGKV1-9
		IGKV1D-12
		IGKV1D-13
		IGKV1D-16
		IGKV1D-17
		IGKV1D-33
		IGKV1D-37
		IGKV1D-39
		IGKV1D-42
		IGKV1D-43
		IGKV1D-8
		IGKV2-24
		IGKV2-28
		IGKV2-30
		IGKV2-40
		IGKV2D-24
		IGKV2D-28
		IGKV2D-29
		IGKV2D-30
		IGKV2D-40
		IGKV3-11
		IGKV3-15
		IGKV3-20
		IGKV3-7
		IGKV3D-11
		IGKV3D-15
		IGKV3D-20
		IGKV3D-7
		IGKV4-1
		IGKV5-2
		IGKV6-21
		IGKV6D-21
		IGKV6D-41
		IGL
		IGLC1
		IGLC2
		IGLC3
		IGLC6
		IGLC7
		IGLJ
		IGLJ1
		IGLJ2
		IGLJ3
		IGLJ4
		IGLJ5
		IGLJ6
		IGLJ7
		IGLV@
		IGLV1-36
		IGLV1-40
		IGLV1-44
		IGLV1-47
		IGLV1-50
		IGLV1-51
		IGLV10-54
		IGLV11-55
		IGLV2-11
		IGLV2-14
		IGLV2-18
		IGLV2-23
		IGLV2-33
		IGLV2-8
		IGLV3-1
		IGLV3-10
		IGLV3-12
		IGLV3-16
		IGLV3-19
		IGLV3-21
		IGLV3-22
		IGLV3-25
		IGLV3-27
		IGLV3-32
		IGLV3-9
		IGLV4-3
		IGLV4-60
		IGLV4-69
		IGLV5-37
		IGLV5-39
		IGLV5-45
		IGLV5-48
		IGLV5-52
		IGLV6-57
		IGLV7-43
		IGLV7-46
		IGLV8-61
		IGLV9-49
		C3
		C5
		CAMP
		CCL1
		CCL11
		CCL13
		CCL14
		CCL15-CCL14
		CCL15
		CCL16
		CCL17
		CCL18
		CCL19
		CCL2
		CCL20
		CCL21
		CCL22
		CCL23
		CCL24
		CCL25
		CCL26
		CCL27
		CCL28
		CCL3
		CCL3L1
		CCL3P1
		CCL3L3
		CCL4
		CCL4L2
		CCL4L1
		CCL5
		CCL7
		CCL8
		CKLF
		CMA1
		CTSG
		CX3CL1
		CXCL1
		CXCL10
		CXCL11
		CXCL12
		CXCL13
		CXCL14
		CXCL16
		CXCL17
		CXCL2
		CXCL3
		CXCL5
		CXCL6
		CXCL9
		CCN1
		DEFA1
		DEFA3
		DEFA5
		DEFB1
		DEFB103B
		DEFB104A
		DEFB4A
		EDN1
		EDN2
		EDN3
		FGF10
		FGF2
		HTN3
		CXCL8
		LECT2
		PF4
		PF4V1
		PLAU
		PPBP
		PPBPP1
		PROK2
		RNASE2
		SAA1
		SAA2
		SBDS
		SEMA3A
		SEMA3B
		SEMA3C
		SEMA3D
		SEMA3E
		SEMA3F
		SEMA3G
		SEMA4A
		SEMA4B
		SEMA4C
		SEMA4D
		SEMA4F
		SEMA4G
		SEMA5A
		SEMA5B
		SEMA6A
		SEMA6B
		SEMA6C
		SEMA6D
		SEMA7A
		SLIT1
		SLIT2
		TNC
		TYMP
		XCL1
		XCL2
		C5AR1
		ACKR2
		CCR1
		CCR10
		CCR3
		CCR4
		CCR5
		CCR6
		CCR7
		CCR8
		CCR9
		ACKR4
		CCRL2
		CMKLR1
		CX3CR1
		CXCR3
		CXCR4
		CXCR5
		CXCR6
		ACKR3
		CYSLTR1
		CYSLTR2
		ACKR1
		EDNRA
		EDNRB
		FPR1
		FPR2
		FPR2
		GPR17
		GPR32
		GPR33
		PTGDR2
		C5AR2
		CXCR1
		CXCR2
		LTB4R
		LTB4R2
		PLAUR
		PLXNA1
		PLXNA2
		PLXNA3
		PLXNA4
		PLXNB1
		PLXNB2
		PLXNB3
		PLXNC1
		PLXND1
		PTAFR
		ROBO1
		ROBO2
		ROBO3
		RXFP3
		XCR1
		ADIPOQ
		ADM
		ADM2
		AGRP
		AGT
		AMBN
		AMELX
		AMH
		ANGPTL5
		ANGPTL7
		APLN
		AREG
		MANF
		CDNF
		ARTN
		AVP
		AZU1
		BDNF
		BMP1
		BMP10
		BMP15
		BMP2
		BMP3
		BMP4
		BMP5
		BMP6
		BMP7
		BMP8A
		BMP8B
		BTC
		MYDGF
		C3
		C5
		CALCA
		CALCB
		CAMP
		CAT
		CCK
		CCL1
		CCL11
		CCL13
		CCL14
		CCL15-CCL14
		CCL15
		CCL16
		CCL17
		CCL18
		CCL19
		CCL2
		CCL20
		CCL21
		CCL22
		CCL23
		CCL24
		CCL25
		CCL26
		CCL27
		CCL28
		CCL3
		CCL3L1
		CCL3P1
		CCL3L3
		CCL4
		CCL4L2
		CCL4L1
		CCL5
		CCL7
		CCL8
		CD320
		CD40LG
		CD70
		ADA2
		CER1
		CGA
		CGB3
		CGB1
		CGB2
		CGB5
		CGB7
		CGB8
		CHGA
		CHGB
		CKLF
		CLCF1
		CLEC11A
		CMA1
		CMTM1
		CMTM2
		CMTM3
		CMTM4
		CMTM5
		CMTM6
		CMTM7
		CMTM8
		CNTF
		CORT
		CRH
		CSF1
		CSF2
		CSF3
		CSH1
		CSH2
		CSHL1
		CSPG5
		CTF1
		CCN2
		CTSG
		CX3CL1
		CXCL1
		CXCL10
		CXCL11
		CXCL12
		CXCL13
		CXCL14
		CXCL16
		CXCL17
		CXCL2
		CXCL3
		CXCL5
		CXCL6
		CXCL9
		CCN1
		DEFA1
		DEFA3
		DEFA5
		DEFB1
		DEFB103B
		DEFB104A
		DEFB4A
		DKK1
		EBI3
		EDN1
		EDN2
		EDN3
		EGF
		EPGN
		EPO
		EREG
		ESM1
		FAM3B
		FAM3C
		FAM3D
		FASLG
		FGF1
		FGF10
		FGF11
		FGF12
		FGF13
		FGF14
		FGF16
		FGF17
		FGF18
		FGF19
		FGF2
		FGF20
		FGF21
		FGF22
		FGF23
		FGF3
		FGF4
		FGF5
		FGF6
		FGF7
		FGF8
		FGF9
		VEGFD
		FIGNL2
		FLT3LG
		FSHB
		GAL
		GALP
		GAST
		GCG
		GDF1
		GDF10
		GDF11
		GDF15
		GDF2
		GDF3
		GDF5
		GDF6
		GDF7
		GDF9
		GDNF
		GH1
		GH2
		GHRH
		GHRL
		GIP
		GKN1
		GMFB
		GMFG
		GNRH1
		GNRH2
		GPHA2
		GPHB5
		GPI
		GREM1
		GREM2
		GRN
		GRP
		GUCA2A
		HAMP
		HBEGF
		HDGF
		HDGFL3
		HGF
		HTN3
		IAPP
		IFNA1
		IFNA10
		IFNA13
		IFNA14
		IFNA16
		IFNA17
		IFNA2
		IFNA21
		IFNA4
		IFNA5
		IFNA6
		IFNA7
		IFNA8
		IFNB1
		IFNE
		IFNG
		IFNK
		IFNW1
		IGF1
		IGF2
		IL10
		IL11
		IL12A
		IL12B
		IL13
		IL15
		IL16
		IL17A
		IL17B
		IL17C
		IL17D
		IL17F
		IL18
		IL19
		IL1A
		IL1B
		IL1F10
		IL36RN
		IL36A
		IL37
		IL36B
		IL36G
		IL1RN
		IL2
		IL20
		IL21
		IL22
		IL23A
		IL24
		IL25
		IL26
		IL27
		IFNL2
		IFNL3
		IFNL1
		IL3
		IL31
		IL32
		IL33
		IL34
		IL4
		IL5
		IL6
		IL6ST
		IL7
		CXCL8
		IL9
		INHA
		INHBA
		INHBB
		INHBC
		INHBE
		INS
		INS-IGF2
		INSL3
		INSL4
		INSL5
		INSL6
		JAG1
		JAG2
		FGF7P6
		FGF7P3
		KITLG
		KL
		LACRT
		LECT2
		LEFTY1
		LEFTY2
		LEP
		LHB
		LIF
		LRSAM1
		LTA
		LTB
		LTBP1
		LTBP2
		LTBP3
		LTBP4
		MDK
		MIA
		MIF
		MLN
		MSTN
		NAMPT
		NDP
		NENF
		NGF
		NMB
		NODAL
		CCN3
		NPFF
		NPPA
		NPPB
		NPPC
		NPY
		NRG1
		NRG2
		NRG3
		NRG4
		NRTN
		NTF3
		NTF4
		NTS
		NUDT6
		OGN
		OSGIN1
		OSM
		OSTN
		OXT
		ENDOU
		PDGFA
		PDGFB
		PDGFC
		PDGFD
		PDGFRA
		PDGFRB
		PDGFRL
		PDYN
		PENK
		PF4
		PF4V1
		PGF
		PLAU
		PMCH
		PNOC
		POMC
		PPBP
		PPBPP1
		PPBPP2
		PPY
		PRL
		PRLH
		PROK1
		PROK2
		PSPN
		PTH
		PTH2
		PTHLH
		PTN
		PYY
		QRFP
		RABEP1
		RABEP2
		REG1A
		RETN
		RETNLB
		RLN1
		RLN2
		RLN3
		RNASE2
		S100A6
		SAA1
		SAA2
		SBDS
		SCG2
		SCGB3A1
		SCT
		AIMP1
		SECTM1
		SEMA3A
		SEMA3B
		SEMA3C
		SEMA3D
		SEMA3E
		SEMA3F
		SEMA3G
		SEMA4A
		SEMA4B
		SEMA4C
		SEMA4D
		SEMA4F
		SEMA4G
		SEMA5A
		SEMA5B
		SEMA6A
		SEMA6B
		SEMA6C
		SEMA6D
		SEMA7A
		SLIT1
		SLIT2
		SLURP1
		SPP1
		SST
		STC1
		STC2
		TAC1
		TDGF1
		TDGF1P3
		TG
		TGFA
		TGFB1
		TGFB2
		TGFB3
		THPO
		TNC
		TNF
		TNFRSF11B
		TNFSF10
		TNFSF11
		TNFSF12
		TNFSF13
		TNFSF13B
		TNFSF14
		TNFSF15
		TNFSF18
		TNFSF4
		TNFSF8
		TNFSF9
		TOR2A
		TRH
		TSHB
		TSLP
		TXLNA
		TYMP
		UCN
		UCN2
		UCN3
		UTS2
		UTS2B
		VEGFA
		VEGFB
		VEGFC
		VGF
		VIP
		XCL1
		XCL2
		ACVR1B
		ACVR1C
		ACVR2A
		ACVR2B
		ACVRL1
		ADCYAP1R1
		ADIPOR1
		ADIPOR2
		ADRB1
		ADRB2
		AGTR1
		AGTR2
		AMHR2
		ANGPT1
		ANGPT4
		ANGPTL1
		ANGPTL2
		ANGPTL3
		ANGPTL4
		ANGPTL6
		APLNR
		AR
		AVPR1A
		AVPR1B
		AVPR2
		BMPR1A
		BMPR1B
		BMPR2
		BRD8
		C3AR1
		C5AR1
		CALCR
		CALCRL
		ACKR2
		CCR1
		CCR10
		CCR3
		CCR4
		CCR5
		CCR6
		CCR7
		CCR8
		CCR9
		ACKR4
		CCRL2
		CD40
		CMKLR1
		CNTFR
		CRHR1
		CRHR2
		CRIM1
		CRLF1
		CRLF2
		CRLF3
		CSF1R
		CSF2RA
		CSF2RB
		CSF3R
		CX3CR1
		CXCR3
		CXCR4
		CXCR5
		CXCR6
		ACKR3
		CYSLTR1
		CYSLTR2
		ACKR1
		EDNRA
		EDNRB
		EGFR
		ENG
		EPOR
		ESR1
		ESR2
		ESRRA
		ESRRB
		ESRRG
		FGFR1
		FGFR2
		FGFR3
		FGFR4
		FGFRL1
		FLT1
		FLT3
		FLT4
		FPR1
		FPR2
		FPR2
		FSHR
		GALR2
		GALR3
		GCGR
		GHR
		GHRHR
		GHSR
		GIPR
		GLP1R
		GLP2R
		GNRHR
		GPER1
		GPR17
		GPR32
		GPR33
		PTGDR2
		C5AR2
		HNF4A
		HNF4G
		HTR3A
		HTR3B
		HTR3C
		HTR3D
		HTR3E
		IFNAR1
		IFNAR2
		IFNGR1
		IFNGR2
		IGF1R
		IGF2R
		IL10RA
		IL10RB
		IL11RA
		IL12RB1
		IL12RB2
		IL13RA1
		IL13RA2
		IL15RA
		IL2RB
		IL17RA
		IL17RB
		IL17RC
		IL17RD
		IL17RE
		IL18R1
		IL18RAP
		IL1R1
		IL1R2
		IL1RAP
		IL1RL1
		IL1RL2
		IL20RA
		IL20RB
		IL21R
		IL22RA1
		IL22RA2
		IL23R
		IL27RA
		IFNLR1
		IL2RA
		IL2RB
		IL2RG
		IL31RA
		IL3RA
		IL4R
		IL5RA
		IL6R
		IL7R
		CXCR1
		CXCR2
		IL9R
		INSR
		KDR
		LEPR
		LGR4
		LGR5
		LGR6
		LHCGR
		LIFR
		LTB4R
		LTB4R2
		LTBR
		MC1R
		MC2R
		MC3R
		MC4R
		MCHR1
		MCHR2
		MET
		MLNR
		MPL
		MTNR1A
		MTNR1B
		NGFR
		NMBR
		NPR1
		NPR3
		NR0B1
		NR0B2
		NR1D1
		NR1D2
		NR1H2
		NR1H3
		NR1H4
		NR1I2
		NR1I3
		NR2C1
		NR2C2
		NR2E1
		NR2E3
		NR2F1
		NR2F2
		NR2F6
		NR3C1
		NR3C2
		NR4A1
		NR4A2
		NR4A3
		NR5A1
		NR5A2
		NR6A1
		NRP1
		NRP2
		OGFR
		OPRD1
		OPRK1
		OPRL1
		OPRM1
		OSMR
		OXTR
		PGR
		PGRMC2
		PLAUR
		PLXNA1
		PLXNA2
		PLXNA3
		PLXNA4
		PLXNB1
		PLXNB2
		PLXNB3
		PLXNC1
		PLXND1
		PPARA
		PPARD
		PPARG
		PRLHR
		PRLR
		PTAFR
		PTGDR
		PTGDS
		PTGER1
		PTGER2
		PTGER3
		PTGER4
		PTGFR
		PTH1R
		PTH2R
		RARA
		RARB
		RARG
		ROBO1
		ROBO2
		ROBO3
		RORA
		RORB
		RORC
		RXFP1
		RXFP2
		RXFP3
		RXRA
		RXRB
		RXRG
		S1PR1
		S1PR2
		SCTR
		SDC1
		SDC2
		SDC3
		SDC4
		SORT1
		SSTR1
		SSTR2
		SSTR5
		ST2
		TACR1
		TEK
		TGFBR1
		TGFBR2
		TGFBR3
		THRA
		THRB
		TIE1
		TNFRSF10A
		TNFRSF10B
		TNFRSF10C
		TNFRSF10D
		TNFRSF11A
		TNFRSF12A
		TNFRSF13B
		TNFRSF13C
		TNFRSF14
		TNFRSF17
		TNFRSF18
		TNFRSF19
		TNFRSF1A
		TNFRSF1B
		TNFRSF21
		TNFRSF25
		TNFRSF4
		TNFRSF6B
		TNFRSF8
		TNFRSF9
		TRHR
		TSHR
		TUBB3
		VDR
		VIPR1
		VIPR2
		XCR1
		IFNA10
		IFNA13
		IFNA14
		IFNA16
		IFNA17
		IFNA2
		IFNA21
		IFNA4
		IFNA5
		IFNA6
		IFNA7
		IFNA8
		IFNB1
		IFNE
		IFNG
		IFNK
		IFNW1
		IFNAR2
		IFNGR1
		IFNGR2
		IL11
		IL12A
		IL12B
		IL13
		IL15
		IL16
		IL17A
		IL17B
		IL17C
		IL17D
		IL17F
		IL18
		IL19
		IL1A
		IL1B
		IL1F10
		IL36RN
		IL36A
		IL37
		IL36B
		IL36G
		IL1RN
		IL2
		IL20
		IL21
		IL22
		IL23A
		IL24
		IL25
		IL26
		IL27
		IFNL2
		IFNL3
		IFNL1
		IL3
		IL31
		IL32
		IL33
		IL34
		IL4
		IL5
		IL6
		IL6ST
		IL7
		CXCL8
		IL9
		TXLNA
		IL10RA
		IL10RB
		IL11RA
		IL12RB1
		IL12RB2
		IL13RA1
		IL13RA2
		IL15RA
		IL2RB
		IL17RA
		IL17RB
		IL17RC
		IL17RD
		IL17RE
		IL18R1
		IL18RAP
		IL1R1
		IL1R2
		IL1RAP
		IL1RL1
		IL1RL2
		IL20RA
		IL20RB
		IL21R
		IL22RA1
		IL22RA2
		IL23R
		IL27RA
		IFNLR1
		IL2RA
		IL2RB
		IL2RG
		IL31RA
		IL3RA
		IL4R
		IL5RA
		IL6R
		IL7R
		CXCR1
		CXCR2
		IL9R
		ST2
		HLA-A
		HLA-B
		HLA-C
		HLA-E
		HLA-G
		KIR3DL1
		KIR3DL2
		KIR2DL1
		KIR2DL2
		KIR2DL3
		KIR2DL4
		KIR2DL5A
		KLRC1
		KLRC2
		KLRC3
		KLRD1
		PTPN6
[truncated: 484 more rows]
