# Supplementary material for: A Comprehensive Study on Molecular Characteristics and Clinical Prognosis of Immune- Related Genes in Idiopathic Pulmonary Fibrosis
Source: Research Square preprint supplement (doi:10.21203/rs.3.rs-7616111/v1), 2025-10-30
Supplement: Supplementary file 4 [file 3dcea5caa8f496fec93b3ff2.xlsx]

## Sheet: Sheet1
ID	Description	GeneRatio	BgRatio	pvalue	p.adjust	qvalue	geneID	Count
hsa04380	Osteoclast differentiation	40/981	135/8662	5.06049e-09	1.67502e-06	1.28377e-06	LILRB4/ITGB3/RELB/SOCS3/LILRB5/LCP2/CTSK/LILRB2/ATP2A3/LILRB3/MAPK13/TNFRSF11A/LILRA3/AKT3/IL1B/LILRA4/PIK3CD/MAP3K14/NFKB2/NFKBIA/IFNAR2/SOCS1/FOSL1/FCGR2B/IL1A/BTK/JUNB/FYN/TRAF2/MAPK8/TGFBR1/IL1R1/ITPR3/IFNAR1/PPARG/TGFBR2/TREM2/FOSB/LILRA6/LILRA2	40
hsa04060	Cytokine-cytokine receptor interaction	67/981	297/8662	1.49514e-08	2.47445e-06	1.89646e-06	CCL2/CCL7/IL1R2/CSF3R/CCL3/CCL8/CCL3L3/CXCL1/IL10/CXCR4/OSM/TNFRSF10C/CCL4/TNFSF14/TNFRSF12A/CCL13/GDF15/CXCL17/TNFRSF8/BMP6/CCR5/TNFRSF11A/IL1B/INHBB/CXCL14/TNFRSF21/CCR1/CCR2/INHBA/IFNAR2/IL1RN/IL15RA/IL6R/TNFSF9/CCR3/IL18R1/IL1A/CXCL10/TNFRSF9/IL2RA/BMP2/IL6/LEP/LTB/IL2RB/TNFRSF4/CD27/FAS/TNFSF15/IL18RAP/CCL22/IL32/TGFBR1/CCL5/CLCF1/TNFRSF10D/IL1R1/TNFRSF14/IFNAR1/EBI3/CCL18/TGFBR2/CXCR6/IL11R…	67
hsa04148	Efferocytosis	41/981	156/8662	1.38702e-07	1.53035e-05	1.17289e-05	MERTK/STAB1/IL10/SGK1/ITGB3/P2RY2/HIF1A/CD24/DUSP5/CH25H/ANO5/GPR132/ATP2A3/SLC2A1/SIGLEC10/MAPK13/PECAM1/ABCA1/AXL/PROS1/SPHK1/PTGER2/DUSP4/CALR/CASP1/RAB17/P2RY6/GAS6/PTGS2/DUSP2/SCARF1/THBS1/HAVCR2/NR1H3/CASP7/AGER/CD36/PPARG/ODC1/S1PR1/CX3CR1	41
hsa04061	Viral protein interaction with cytokine and cytokine receptor	30/981	100/8662	3.11981e-07	2.58164e-05	1.97861e-05	CCL2/CCL7/CCL3/CCL8/CCL3L3/CXCL1/IL10/CXCR4/TNFRSF10C/CCL4/TNFSF14/CCL13/CCR5/CXCL14/CCR1/CCR2/IL6R/CCR3/IL18R1/CXCL10/IL2RA/IL6/IL2RB/IL18RAP/CCL22/CCL5/TNFRSF10D/TNFRSF14/CCL18/CX3CR1	30
hsa04668	TNF signaling pathway	32/981	114/8662	6.74928e-07	4.46803e-05	3.42437e-05	CCL2/MMP9/CXCL1/ICAM1/BCL3/SOCS3/MAPK13/AKT3/IL1B/PIK3CD/MAP3K14/NFKBIA/MAP2K3/CREB5/RPS6KA5/CASP10/IL18R1/CXCL10/TRAF5/EDN1/IL6/PTGS2/JUNB/TRAF2/FAS/CFLAR/MAPK8/BAG4/CCL5/BIRC3/CASP7/MMP14	32
hsa04064	NF-kappa B signaling pathway	28/981	104/8662	8.06929e-06	0.000445156	0.000341175	CXCL1/ICAM1/RELB/CCL4/TNFSF14/CCL13/PRKCB/TNFRSF11A/IL1B/GADD45B/CD14/MAP3K14/NFKB2/NFKBIA/GADD45G/BCL2A1/PLAU/TRAF5/BTK/LTB/IRAK1/PTGS2/BCL2/TRAF2/CFLAR/BIRC3/IL1R1/TICAM1	28
hsa04933	AGE-RAGE signaling pathway in diabetic complications	27/981	100/8662	1.10172e-05	0.000520958	0.000399271	CCL2/ICAM1/PRKCB/MAPK13/AKT3/IL1B/PIK3CD/SMAD3/COL4A2/PIM1/PRKCZ/EGR1/NRAS/IL1A/CCND1/VEGFA/EDN1/IL6/BCL2/MAPK8/F3/TGFBR1/AGER/CDK4/TGFBR2/PRKCE/MMP2	27
hsa04068	FoxO signaling pathway	32/981	131/8662	1.69803e-05	0.000687682	0.000527052	HOMER3/IL10/PLK3/SGK1/SOD2/MAPK13/AKT3/CAT/GADD45B/PIK3CD/SMAD3/IRS2/GADD45G/GABARAPL1/NRAS/IGF1/CCND2/CCND1/BNIP3/IL6/INSR/NLK/BCL6/CSNK1E/MAPK8/TGFBR1/FBXO32/S1PR4/TGFBR2/S1PR1/FASLG/FBXO25	32
hsa05144	Malaria	17/981	50/8662	1.86983e-05	0.000687682	0.000527052	CCL2/TLR2/IL10/ICAM1/MET/PECAM1/IL1B/HBA2/THBS3/HBB/SDC1/ITGAL/GYPC/IL6/THBS1/CD36/THBS4	17
hsa04510	Focal adhesion	43/981	203/8662	3.09854e-05	0.00102562	0.00078605	SPP1/PXN/EMP1/LAMB3/ITGB3/MET/LAMA3/EMP2/PRKCB/PAK1/AKT3/VCL/ITGB4/THBS3/PIK3CD/ITGA7/LAMC1/LAMC2/FLNB/COL4A2/LAMB1/IGF1/VAV3/CCND2/CCND1/VEGFA/PARVA/BCL2/FYN/CAV1/PDGFD/MAPK8/THBS1/COL6A1/ITGB8/KDR/PPP1CC/BIRC3/SHC2/ITGB7/THBS4/ITGA3/COL9A2	43
hsa05133	Pertussis	21/981	76/8662	7.1119e-05	0.00214003	0.00164016	IL10/C1S/NLRP3/SFTPA2/C1R/MAPK13/C3/SFTPA1/IL1B/CD14/CALM3/IL1A/CASP1/IL6/IRAK1/ITGAM/MAPK8/CASP7/GNAI1/TICAM1/SERPING1	21
hsa04512	ECM-receptor interaction	23/981	89/8662	0.000101891	0.0028105	0.00215402	SPP1/LAMB3/ITGB3/LAMA3/ITGB4/THBS3/ITGA7/SDC1/LAMC1/HSPG2/LAMC2/COL4A2/LAMB1/SDC4/THBS1/COL6A1/ITGB8/GP1BA/CD36/ITGB7/THBS4/ITGA3/COL9A2	23
hsa04931	Insulin resistance	26/981	108/8662	0.000132837	0.00338223	0.0025922	TBC1D4/SOCS3/SLC2A1/PRKCB/AKT3/PIK3CD/NFKBIA/MLXIPL/IRS2/PTPRF/SLC27A2/CREB5/PRKCZ/RPS6KA2/TRIB3/PPP1R3B/IL6/INSR/SLC27A3/PYGB/SREBF1/MAPK8/PPP1CC/NR1H3/CD36/PRKCE	26
hsa05222	Small cell lung cancer	23/981	92/8662	0.000175096	0.00357677	0.0027413	LAMB3/LAMA3/CDK6/AKT3/GADD45B/PIK3CD/MYC/NFKBIA/LAMC1/LAMC2/TRAF4/GADD45G/COL4A2/CKS1B/LAMB1/CCND1/TRAF5/PTGS2/BCL2/TRAF2/BIRC3/CDK4/ITGA3	23
hsa05205	Proteoglycans in cancer	41/981	205/8662	0.0001804	0.00357677	0.0027413	PXN/MMP9/TLR2/ITGB3/MET/CTTN/HIF1A/PRKCB/PAK1/MAPK13/AKT3/FZD2/TIMP3/PIK3CD/MYC/SDC1/HSPG2/FLNB/HPSE/NRAS/PLAU/IGF1/VAV3/FZD6/CCND1/VEGFA/SDC4/FAS/CAV1/THBS1/NANOG/KDR/PPP1CC/EZR/ERBB3/GPC1/WNT9B/ITPR3/MRAS/FASLG/MMP2	41
hsa04625	C-type lectin receptor signaling pathway	25/981	104/8662	0.000182197	0.00357677	0.0027413	IL10/PLK3/RELB/BCL3/NLRP3/EGR3/PAK1/MAPK13/AKT3/IL1B/PIK3CD/MAP3K14/NFKB2/NFKBIA/NRAS/CLEC6A/CALM3/CASP1/IL6/PTGS2/CBLB/MAPK8/CCL22/ITPR3/MRAS	25
hsa04062	Chemokine signaling pathway	39/981	192/8662	0.000183701	0.00357677	0.0027413	CCL2/CCL7/PXN/CCL3/CCL8/CCL3L3/CXCL1/CXCR4/JAK3/CCL4/CCL13/CCR5/PREX1/PRKCB/PAK1/AKT3/RASGRP2/CXCL14/PIK3CD/NFKBIA/CCR1/CCR2/PRKCZ/NRAS/CCR3/VAV3/PIK3CG/CXCL10/GNG2/PIK3R6/CCL22/CCL5/SHC2/GNAI1/PARD3/CCL18/CXCR6/FGR/CX3CR1	39
hsa04210	Apoptosis	30/981	136/8662	0.000226673	0.00416826	0.00319463	CTSK/AKT3/HRK/GZMB/GADD45B/PIK3CD/MAP3K14/NFKBIA/TUBA1C/GADD45G/CASP10/TUBA4A/BCL2A1/NRAS/CTSB/CTSO/CASP6/BCL2/CTSF/TRAF2/FAS/CFLAR/MAPK8/PRF1/BIRC3/CASP7/ITPR3/FASLG/AIFM1/PMAIP1	30
hsa00920	Sulfur metabolism	6/981	10/8662	0.000291639	0.00508066	0.0038939	PAPSS2/SELENBP1/BPNT1/TST/ETHE1/MPST	6
hsa04514	Cell adhesion molecules	33/981	158/8662	0.000331208	0.00516794	0.0039608	ICAM1/CLDN4/SELL/SLITRK4/PECAM1/CLDN3/SDC1/ITGAL/PTPRF/CDH1/CLDN18/CDH3/NTNG2/CD8A/CD8B/ICOS/ICAM3/SDC4/CTLA4/PDCD1/SDC3/ICAM2/SPN/ICOSLG/HLA-DRB4/ITGAM/SELPLG/ITGB8/ITGB7/PDCD1LG2/CLDN11/CLDN1/PTPRM	33
hsa05142	Chagas disease	24/981	102/8662	0.000343488	0.00516794	0.0039608	CCL2/CCL3/CCL3L3/TLR2/IL10/MAPK13/C3/AKT3/IL1B/PIK3CD/NFKBIA/CALR/IL6/IRAK1/CD247/FAS/CFLAR/MAPK8/TGFBR1/CCL5/GNAI1/TGFBR2/TICAM1/FASLG	24
hsa05146	Amoebiasis	24/981	102/8662	0.000343488	0.00516794	0.0039608	IL1R2/CXCL1/TLR2/IL10/LAMB3/LAMA3/C8B/PRKCB/IL1B/VCL/PIK3CD/CD14/SERPINB9/LAMC1/LAMC2/COL4A2/LAMB1/IL6/SERPINB4/ITGAM/C8A/C8G/IL1R1/SERPINB3	24
hsa04610	Complement and coagulation cascades	21/981	86/8662	0.000466016	0.00670657	0.00514004	C1S/C1R/C8B/C3/PROC/PROS1/A2M/PLAU/F13A1/CFH/SERPINA1/ITGAM/C8A/F5/C8G/F3/ITGAX/CLU/CFHR3/SERPING1/MASP2	21
hsa05143	African trypanosomiasis	12/981	37/8662	0.000519063	0.00715874	0.00548658	IL10/ICAM1/F2RL1/PRKCB/IL1B/HBA2/HBB/IDO1/IL6/HPR/FAS/FASLG	12
hsa04640	Hematopoietic cell lineage	23/981	99/8662	0.000549271	0.00727235	0.00557366	IL1R2/CSF3R/ITGB3/CD24/IL1B/CD14/MME/CD8A/IL6R/FCER2/CD8B/IL1A/IL2RA/KITLG/IL6/ANPEP/HLA-DRB4/ITGAM/GP1BA/CD36/IL1R1/IL11RA/ITGA3	23
hsa04657	IL-17 signaling pathway	22/981	94/8662	0.00064602	0.00822433	0.00630327	CCL2/CCL7/MMP9/CXCL1/MMP1/MAPK13/IL1B/LCN2/NFKBIA/TRAF4/FOSL1/CXCL10/TRAF5/TRAF3IP2/IL6/PTGS2/MAPK6/TRAF2/S100A9/MAPK8/S100A8/FOSB	22
hsa05169	Epstein-Barr virus infection	38/981	202/8662	0.00105587	0.012626	0.00967681	TLR2/ICAM1/JAK3/RELB/CDK6/MAPK13/AKT3/GADD45B/PIK3CD/MAP3K14/MYC/NFKB2/NFKBIA/ITGAL/RUNX3/MAP2K3/GADD45G/IFNAR2/TAP1/FCER2/CALR/CCND2/CCND1/CXCL10/TRAF5/BTK/IL6/IRAK1/CD247/BCL2/SAP30/TRAF2/FAS/HLA-DRB4/MAPK8/CDK4/IFNAR1/NEDD4	38
hsa05134	Legionellosis	15/981	56/8662	0.00106806	0.012626	0.00967681	CXCL1/TLR2/C3/IL1B/CD14/NFKB2/NFKBIA/NLRC4/BNIP3/CASP1/IL6/ITGAM/BCL2L13/CASP7/HSPA6	15
hsa05163	Human cytomegalovirus infection	41/981	225/8662	0.00130586	0.0149049	0.0114234	CCL2/PXN/CCL3/CCL3L3/CXCR4/ITGB3/CCL4/CDK6/CCR5/PRKCB/MAPK13/AKT3/IL1B/PIK3CD/MYC/NFKBIA/CCR1/TAP1/CREB5/PTGER2/IL6R/NRAS/CCR3/CALM3/CALR/CCND1/GNA12/TRAF5/VEGFA/IL6/PTGS2/GNG2/TRAF2/FAS/PTGER3/CCL5/CDK4/IL1R1/GNAI1/ITPR3/FASLG	41
hsa05219	Bladder cancer	12/981	41/8662	0.00144299	0.015921	0.0122022	MMP9/MMP1/MYC/CDH1/RPS6KA5/NRAS/CCND1/VEGFA/DAPK2/THBS1/CDK4/MMP2	12
hsa05417	Lipid and atherosclerosis	39/981	215/8662	0.00184651	0.0194549	0.0149105	CCL2/MMP9/CCL3/CCL3L3/CXCL1/TLR2/ICAM1/SOD2/NLRP3/MMP1/MAPK13/AKT3/IL1B/ABCA1/PIK3CD/CD14/NFKBIA/MAP2K3/NRAS/VAV3/CALM3/CASP1/IL6/IRAK1/CASP6/BCL2/TRAF2/FAS/MAPK8/CCL5/ABCG1/CASP7/AGER/CD36/PPARG/TICAM1/FASLG/HSPA6/CYP2J2	39
hsa04151	PI3K-Akt signaling pathway	59/981	359/8662	0.00188262	0.0194549	0.0149105	SPP1/CSF3R/TLR2/SGK1/LAMB3/ITGB3/OSM/JAK3/MYB/MET/LAMA3/CDK6/AKT3/ITGB4/THBS3/PIK3CD/AREG/ITGA7/MYC/LAMC1/CHRM2/LAMC2/COL4A2/ANGPT2/IFNAR2/CREB5/PKN2/LAMB1/IL6R/NRAS/IGF1/CCND2/PIK3CG/CCND1/VEGFA/IL2RA/KITLG/PPP2R3A/IL6/IL2RB/INSR/GNG2/BCL2/PDGFD/THBS1/YWHAB/COL6A1/ITGB8/PIK3R6/KDR/ANGPT4/CDK4/ERBB3/ITGB7/IFNAR1/FASLG/THBS4/ITGA3/COL9A2	59
hsa04010	MAPK signaling pathway	51/981	301/8662	0.00193961	0.0194549	0.0149105	RELB/PTPN7/MET/DUSP5/MAP3K3/PRKCB/PAK1/MAPK13/AKT3/IL1B/GADD45B/RASGRP2/AREG/CD14/MAP3K14/MYC/NFKB2/CACNB3/FLNB/MAP2K3/GADD45G/ANGPT2/RASGRP3/RPS6KA5/NRAS/RPS6KA2/IGF1/DUSP4/IL1A/GNA12/VEGFA/KITLG/IRAK1/INSR/NLK/DUSP2/TRAF2/FAS/PDGFD/MAPK8/KDR/ANGPT4/TGFBR1/ERBB3/IL1R1/CACNA1B/TGFBR2/MRAS/MAP3K6/FASLG/HSPA6	51
hsa05150	Staphylococcus aureus infection	21/981	96/8662	0.00211034	0.0205448	0.0157459	IL10/ICAM1/DEFA3/KRT19/C1S/KRT23/FCAR/KRT17/C1R/C3/FPR3/KRT18/ITGAL/KRT14/CAMP/FCGR2B/CFH/HLA-DRB4/ITGAM/SELPLG/MASP2	21
hsa04015	Rap1 signaling pathway	38/981	210/8662	0.00219538	0.0207011	0.0158657	ITGB3/MET/ARAP3/LCP2/ID1/PRKCB/MAPK13/ADORA2A/AKT3/RASGRP2/PIK3CD/ITGAL/ADORA2B/CDH1/MAP2K3/ANGPT2/RASGRP3/PRKCZ/NRAS/IGF1/VAV3/CALM3/VEGFA/DOCK4/RALGDS/ENAH/KITLG/INSR/ITGAM/EVL/PDGFD/THBS1/KDR/ANGPT4/GNAI1/PARD3/MRAS/RALA	38
hsa04662	B cell receptor signaling pathway	19/981	84/8662	0.00225148	0.0207011	0.0158657	LILRB4/IFITM1/LILRB5/LILRB2/LILRB3/PRKCB/LILRA3/AKT3/LILRA4/PIK3CD/NFKBIA/RASGRP3/NRAS/VAV3/FCGR2B/BTK/DAPP1/LILRA6/LILRA2	19
hsa05145	Toxoplasmosis	23/981	111/8662	0.00280636	0.0251055	0.0192413	TLR2/IL10/LAMB3/PPIF/LAMA3/CCR5/MAPK13/AKT3/NFKBIA/LAMC1/LAMC2/MAP2K3/SOCS1/LAMB1/PIK3CG/IRAK1/BCL2/HLA-DRB4/MAPK8/PIK3R6/BIRC3/GNAI1/HSPA6	23
hsa00330	Arginine and proline metabolism	13/981	50/8662	0.00301143	0.0256451	0.0196548	MAOA/ALDH2/CKB/PRODH/SMOX/PYCR1/ALDH4A1/ALDH3A2/CKM/CKMT1A/GAMT/ODC1/AGMAT	13
hsa04621	NOD-like receptor signaling pathway	34/981	186/8662	0.00308769	0.0256451	0.0196548	CCL2/ANTXR2/CXCL1/DEFA3/NLRP3/CARD16/MAPK13/IL1B/TRPM2/NFKBIA/CAMP/IFNAR2/GABARAPL1/PKN2/PSTPIP1/NLRC4/CTSB/TRAF5/CASP1/IL6/NLRX1/BCL2/TRAF2/MAP1LC3C/MAPK8/RNASEL/NLRP1/GBP7/CCL5/BIRC3/ITPR3/IFNAR1/TICAM1/GBP2	34
hsa05202	Transcriptional misregulation in cancer	35/981	193/8662	0.0030991	0.0256451	0.0196548	MMP9/IL1R2/MET/DEFA3/ETV5/GZMB/GADD45B/CD14/MAF/MYC/MLF1/GADD45G/BCL2A1/MPO/PLAU/IGF1/CCND2/CEBPE/IL6/IL2RB/IGFBP3/BCL6/ITGAM/PAX8/RUNX1/BIRC3/ITGB7/NR4A3/FUS/ETV7/PPARG/TGFBR2/BCL11B/SIX1/SUPT3H	35
hsa04145	Phagosome	29/981	152/8662	0.00318575	0.0257191	0.0197115	TUBB3/TLR2/ITGB3/CORO1A/FCAR/SFTPA2/MRC2/C1R/C3/SFTPA1/THBS3/CD14/TUBA1C/SCARB1/STX12/ATP6V1C1/TAP1/SFTPD/TUBA4A/MPO/FCGR2B/CALR/HLA-DRB4/ITGAM/THBS1/STX18/CD36/ATP6V0D2/THBS4	29
hsa05323	Rheumatoid arthritis	20/981	93/8662	0.00328647	0.0259005	0.0198506	CCL2/CCL3/CCL3L3/CXCL1/TLR2/ICAM1/CTSK/MMP1/TNFRSF11A/IL1B/ITGAL/ATP6V1C1/IL1A/VEGFA/CTLA4/IL6/LTB/HLA-DRB4/CCL5/ATP6V0D2	20
hsa05167	Kaposi sarcoma-associated herpesvirus infection	35/981	194/8662	0.00338236	0.0260363	0.0199547	CXCL1/ICAM1/HIF1A/CDK6/CCR5/PREX1/MAPK13/C3/AKT3/PIK3CD/MYC/NFKBIA/CCR1/ANGPT2/IFNAR2/ZFP36/NRAS/CCR3/CALM3/PIK3CG/CCND1/TCF7L2/VEGFA/IL6/PTGS2/GNG2/TRAF2/FAS/MAP1LC3C/MAPK8/PIK3R6/CDK4/ITPR3/IFNAR1/TICAM1	35
hsa04620	Toll-like receptor signaling pathway	22/981	108/8662	0.00426198	0.0320617	0.0245726	SPP1/CCL3/CCL3L3/TLR2/CCL4/CTSK/MAPK13/AKT3/IL1B/PIK3CD/CD14/NFKBIA/MAP2K3/IFNAR2/TLR7/CXCL10/IL6/IRAK1/MAPK8/CCL5/IFNAR1/TICAM1	22
hsa04390	Hippo signaling pathway	29/981	157/8662	0.00515743	0.0379358	0.0290746	ID1/BMP6/FZD2/AREG/MYC/SMAD3/WWC1/SNAI2/CDH1/YAP1/PRKCZ/CCND2/FZD6/CCND1/TCF7L2/BMP2/DVL1/TP53BP2/CSNK1E/AJUBA/YWHAB/DLG3/TGFBR1/PPP1CC/BIRC3/WNT9B/WTIP/PARD3/TGFBR2	29
hsa05162	Measles	26/981	138/8662	0.00600949	0.0432422	0.0331416	TLR2/JAK3/CDK6/AKT3/IL1B/PIK3CD/NFKBIA/IFNAR2/FCGR2B/TLR7/CCND2/IL1A/CCND1/IL2RA/IL6/IRAK1/IL2RB/CBLB/BCL2/SLAMF1/FAS/MAPK8/CDK4/IFNAR1/FASLG/HSPA6	26
hsa04960	Aldosterone-regulated sodium reabsorption	10/981	37/8662	0.00660587	0.0456555	0.0349912	SGK1/SFN/PRKCB/PIK3CD/IGF1/NEDD4L/INSR/NR3C2/ATP1B1/SCNN1A	10
hsa05418	Fluid shear stress and atherosclerosis	26/981	139/8662	0.00662074	0.0456555	0.0349912	CCL2/MMP9/IL1R2/ICAM1/ITGB3/ASS1/MAPK13/PECAM1/AKT3/IL1B/PIK3CD/SDC1/PRKCZ/CALM3/IL1A/VEGFA/SDC4/HMOX1/EDN1/BCL2/CAV1/MAPK8/KDR/GPC1/IL1R1/MMP2	26
hsa05210	Colorectal cancer	18/981	86/8662	0.006912	0.0466912	0.035785	AKT3/GADD45B/PIK3CD/AREG/MYC/SMAD3/GADD45G/NRAS/CCND1/TCF7L2/RALGDS/MSH3/BCL2/MAPK8/TGFBR1/TGFBR2/RALA/PMAIP1	18
hsa04071	Sphingolipid signaling pathway	23/981	121/8662	0.00845525	0.0559737	0.0428993	S1PR2/S1PR3/PRKCB/MAPK13/AKT3/SGPP2/PIK3CD/ADORA3/SPHK1/PRKCZ/NRAS/GNA12/SGMS2/PPP2R3A/BCL2/FYN/TRAF2/MAPK8/ACER1/GNAI1/S1PR4/S1PR1/PRKCE	23
hsa04066	HIF-1 signaling pathway	21/981	109/8662	0.00991103	0.0643246	0.0492995	HIF1A/TIMP1/PFKFB3/SLC2A1/PRKCB/AKT3/ENO2/PFKP/PIK3CD/ANGPT2/IL6R/IGF1/VEGFA/HMOX1/EDN1/IL6/INSR/BCL2/HK2/ANGPT4/LDHB	21
