# Supplementary material for: A Comprehensive Study on Molecular Characteristics and Clinical Prognosis of Immune- Related Genes in Idiopathic Pulmonary Fibrosis
Source: Research Square preprint supplement (doi:10.21203/rs.3.rs-7616111/v1), 2025-10-30
Supplement: Supplementary file 5 [file 526779dd8f4bfa733df9c398.xlsx]

## Sheet: Sheet1
	PPBP	SFTPD	CCL7	ADM
Activated B cell	-0.0706924	0.0538455	0.0514814	0.0460621
Activated CD4 T cell	-0.0533734	0.215245	0.372254	0.313262
Activated CD8 T cell	-0.206548	0.156615	0.141603	0.205932
Activated dendritic cell	-0.30771	0.154033	0.172962	0.294655
CD56bright natural killer cell	-0.156699	0.213066	0.284355	0.348646
CD56dim natural killer cell	-0.0637388	0.268376	0.365136	0.418288
Eosinophil	-0.193737	0.206654	0.312299	0.39991
Gamma delta T cell	0.160236	0.228954	0.547747	0.411059
Immature B cell	-0.188724	-0.0787145	-0.132733	-0.0138708
Immature dendritic cell	0.068325	-0.0287849	0.123854	0.150892
MDSC	0.00163879	0.113495	0.307374	0.438122
Macrophage	-0.04814	0.243718	0.33899	0.470994
Mast cell	-0.0449824	0.191981	0.202902	0.292804
Monocyte	0.108903	0.0558089	0.0367544	0.178051
Natural killer T cell	-0.18778	0.0961149	0.120179	0.151146
Natural killer cell	0.0640734	0.246192	0.451898	0.438829
Neutrophil	0.0277075	0.238483	0.646581	0.8255
Plasmacytoid dendritic cell	-0.0210885	0.198666	0.234268	0.42864
Regulatory T cell	-0.155043	0.171618	0.514397	0.419126
T follicular helper cell	-0.209722	0.281079	0.336633	0.389242
Type 1 T helper cell	-0.196555	0.176075	0.193426	0.224319
Type 17 T helper cell	-0.0316069	-0.0627229	0.103638	-0.00556351
Type 2 T helper cell	0.142837	-0.0780277	0.168445	0.0342846
