# Supplementary material for: A Comprehensive Study on Molecular Characteristics and Clinical Prognosis of Immune- Related Genes in Idiopathic Pulmonary Fibrosis
Source: Research Square preprint supplement (doi:10.21203/rs.3.rs-7616111/v1), 2025-10-30
Supplement: Supplementary file 6 [file 59cb0676af32e924fdc9d62c.xlsx]

## Sheet: Sheet1
id	HR	HR.95L	HR.95H	pvalue
age	1.00238	0.980514	1.02472	0.832964
gender	1.38098	0.796209	2.39522	0.250614
gap	1.39503	1.23664	1.5737	6.15273e-08
riskScore	1.30091	1.22847	1.37762	2.27648e-19
