# Supplementary material for: A Comprehensive Study on Molecular Characteristics and Clinical Prognosis of Immune- Related Genes in Idiopathic Pulmonary Fibrosis
Source: Research Square preprint supplement (doi:10.21203/rs.3.rs-7616111/v1), 2025-10-30
Supplement: Supplementary file 8 [file bf42ba67f081a323c78c1d64.xlsx]

## Sheet: Sheet1
id	HR	HR.95L	HR.95H	pvalue
age	0.991217	0.965444	1.01768	0.511651
gender	0.84426	0.461269	1.54525	0.583061
gap	1.32871	1.15312	1.53104	8.49169e-05
riskScore	1.25632	1.18051	1.337	6.70127e-13
