# Supplementary material for: A Comprehensive Study on Molecular Characteristics and Clinical Prognosis of Immune- Related Genes in Idiopathic Pulmonary Fibrosis
Source: Research Square preprint supplement (doi:10.21203/rs.3.rs-7616111/v1), 2025-10-30
Supplement: Supplementary file 9 [file c28b2871a38a74cc3a861d30.xlsx]

## Sheet: Sheet1
id	futime	fustat	PPBP	SFTPD	CCL7	ADM	riskScore	risk
GSM1820740	0.835616	1	3.6395	2.57216	2.65232	2.96705	0.308505	low
GSM1820743	3.84658	1	3.69847	2.48313	2.87775	3.17128	0.683043	low
GSM1820744	1.96712	1	3.89811	2.43157	2.83594	3.02072	0.533729	low
GSM1820745	0.457534	1	3.67565	2.5492	2.98007	2.96854	0.456671	low
GSM1820746	2.88767	1	3.835	2.12609	2.51395	3.00809	0.196108	low
GSM1820749	2.96164	1	3.65507	2.32679	3.06859	3.18428	0.633529	low
GSM1820753	2.22192	1	3.78063	2.558	2.74138	3.21565	0.86115	high
GSM1820754	6.84384	0	3.51432	2.50102	2.70627	2.98818	0.253323	low
GSM1820756	0.224658	1	3.87166	2.77362	3.17232	3.31903	3.11079	high
GSM1820757	2.25753	1	3.40458	2.44168	2.80177	3.15946	0.352354	low
GSM1820760	6.12877	0	3.47531	2.7482	2.51968	2.9769	0.280312	low
GSM1820762	2.55616	1	3.76865	2.64078	3.17232	3.29229	1.95955	high
GSM1820763	5.46027	0	3.80358	2.53659	2.86825	3.13546	0.787905	low
GSM1820764	3.22192	1	3.40413	2.69184	3.17259	3.38295	1.54016	high
GSM1820765	0.605479	1	4.04504	2.24402	3.04516	3.31287	1.46867	high
GSM1820766	2.67123	1	3.56498	1.75381	2.87164	3.37114	0.294944	low
GSM1820770	3.12329	1	3.92419	2.79033	3.107	3.06038	1.52585	high
GSM1820772	1.18356	1	3.81077	3.01836	3.2582	3.24036	3.6926	high
GSM1820774	2.44658	1	3.85835	2.8012	3.18667	3.37425	3.80081	high
GSM1820776	4.00274	0	3.18429	2.3692	1.63114	3.10791	0.0508316	low
GSM1820778	0.123288	1	3.77368	2.91266	3.26853	3.50771	6.43085	high
GSM1820779	1.49863	1	3.71139	2.91827	1.59355	3.37402	0.609291	low
GSM1820781	1.6411	1	3.89234	2.48538	3.39954	3.51336	4.54456	high
GSM1820784	0.575342	1	3.45627	3.02843	3.35603	3.6008	6.73578	high
GSM1820786	0.619178	1	3.94456	3.05703	3.16511	3.35204	6.08597	high
GSM1820787	1.83562	0	3.52492	2.4582	2.82532	3.05338	0.3317	low
GSM1820788	0.268493	1	3.60209	2.63827	3.18819	3.53999	3.11777	high
GSM1820789	1.74247	0	3.49771	2.67538	2.91395	3.12427	0.615452	low
GSM1820792	0.838356	1	3.86534	2.76102	3.50335	3.30904	4.24571	high
GSM1820793	0.219178	1	3.27272	3.02593	3.52181	3.86139	12.8054	high
GSM1820796	1.43288	0	3.74546	2.78094	2.70731	3.17832	1.01345	high
GSM1820797	2.29863	0	3.77822	2.58514	2.75695	3.01416	0.50831	low
GSM1820798	0.180822	1	3.80847	3.03593	3.68708	3.6507	20.1694	high
GSM1820800	0.0575342	1	3.079	2.71772	3.39207	3.7928	3.9997	high
GSM1820801	0.243836	1	3.68459	2.85145	3.00447	3.31314	2.12894	high
GSM1820802	1.50959	0	3.48789	2.60123	2.99533	3.1532	0.639015	low
GSM1820803	0.350685	1	3.23367	2.69524	3.09935	3.50654	1.55164	high
GSM1820807	1.29315	1	3.29529	3.18673	3.25135	3.41483	3.49056	high
GSM1820809	2.15616	1	3.77022	2.68713	3.2606	3.31654	2.51122	high
GSM1820810	2.88767	0	3.60874	2.59942	2.68388	3.06029	0.417016	low
GSM1820811	2.88219	0	3.39263	2.46462	2.80258	3.01133	0.233601	low
GSM1820812	1.03562	1	3.71399	2.58581	3.035	2.99571	0.59376	low
GSM1820813	1.88493	1	3.85453	2.55255	3.27434	3.48413	3.81153	high
GSM1820814	1.35068	1	3.48747	2.50532	2.89621	3.1745	0.5193	low
GSM1820815	2.62466	1	3.62049	2.4299	3.08982	3.25139	0.883255	high
GSM1820817	1.60548	1	3.58253	3.1579	3.38587	3.52623	8.50553	high
GSM1820818	3.0274	0	3.73739	2.52421	2.67022	3.26359	0.806336	high
GSM1820820	0.30137	1	4.00798	2.87107	3.32138	3.33259	5.59269	high
GSM1820821	1.29315	1	3.62613	2.56157	3.33411	3.40205	2.25398	high
GSM1820823	2.30411	0	3.75763	2.24182	2.70469	2.99603	0.250288	low
GSM1820825	1.06301	1	3.53312	2.64658	3.6339	3.75871	8.79582	high
GSM1820827	3.02466	0	3.63036	2.55672	2.55456	2.93782	0.243998	low
GSM1820828	3.00548	0	3.67469	2.59402	2.81322	3.1482	0.686095	low
GSM1820829	0.115068	1	3.69664	3.07387	3.6449	3.70058	19.7599	high
GSM1820833	1.52603	1	3.62131	2.36403	3.11876	3.30866	0.968291	high
GSM1820834	1.80822	0	3.33479	2.39561	2.91781	3.02325	0.223773	low
GSM1820835	0.394521	1	3.57358	2.90629	2.91113	3.15237	1.09953	high
GSM1820836	0.742466	1	3.76293	2.91058	2.76955	3.1421	1.24492	high
GSM1820837	1.69589	0	3.0381	2.68806	3.10008	3.21824	0.484372	low
GSM1820838	2.35342	0	3.3446	2.31847	2.96572	3.16621	0.32013	low
GSM1820839	1.59726	0	3.48448	2.92086	2.89082	3.37143	1.8015	high
GSM1820841	1.50411	0	3.91217	2.64003	2.69606	2.96221	0.554632	low
GSM1820843	1.47945	1	3.81377	2.46238	3.1412	3.14888	1.00096	high
GSM1820847	1.09863	1	3.53239	3.22196	3.18995	3.15656	2.39065	high
GSM1820850	0.668493	1	3.68677	2.43499	3.68974	3.294	2.19731	high
GSM1820851	3.95342	1	3.63492	2.55909	2.73419	3.22277	0.690563	low
GSM1820853	0.586301	1	3.25562	2.87795	3.10507	3.31194	1.24107	high
GSM1820854	0.991781	0	3.59779	2.49202	3.29009	3.04866	0.654899	low
GSM1820855	1.28219	1	3.80759	2.53397	3.10286	3.33242	1.82002	high
GSM1820856	1.85205	1	3.65699	2.61958	2.93741	3.13555	0.770337	low
GSM1820857	3.89589	0	3.8419	2.37944	2.85944	3.18036	0.73041	low
GSM1820858	4.03288	1	2.96708	3.2108	2.82703	3.10502	0.540295	low
GSM1820859	1.1863	0	3.76349	2.55702	2.98199	3.05388	0.684485	low
GSM1820860	3.48219	0	3.52102	2.08386	2.04731	2.72588	0.0287825	low
GSM1820861	3.50959	1	3.51007	2.34652	3.4355	3.32105	1.16227	high
GSM1820862	1.91507	0	3.58518	2.9312	2.59548	3.04173	0.594148	low
GSM1820863	0.961644	1	3.8682	3.13248	3.30923	3.46412	9.91203	high
GSM1820864	0.89863	0	3.54149	2.66747	3.14761	3.56112	3.01379	high
GSM1820865	1.44932	0	3.20593	2.47973	2.71974	3.28412	0.356644	low
GSM1820866	2.31781	0	3.47247	2.5833	2.74805	2.86856	0.200654	low
GSM1820868	1.14795	0	3.36604	2.13519	3.06794	3.07751	0.212533	low
GSM1820869	3.43288	0	3.58859	2.71115	2.15399	3.04986	0.259836	low
GSM1820871	3.39726	0	3.75842	2.84087	3.10099	3.30516	2.56606	high
GSM1820875	2.51507	0	3.33245	2.61873	2.53128	3.42968	0.679259	low
GSM1820876	4.97808	0	3.71957	2.65938	2.85059	3.07703	0.696415	low
GSM1820877	0.819178	1	3.89326	2.71952	3.37646	3.43386	5.1719	high
GSM1820883	2.47123	0	3.67144	2.48125	3.31571	3.22748	1.25373	high
GSM1820884	1.08219	1	3.6543	2.60841	2.51646	3.20358	0.57254	low
GSM1820886	3.4137	0	3.46654	2.57322	2.79013	3.14607	0.45889	low
GSM1820888	0.586301	1	3.67609	2.61108	2.91991	2.96298	0.465337	low
GSM1820889	0.953425	0	3.36429	2.60925	2.98808	3.29819	0.801641	low
GSM1820890	0.547945	1	3.76721	2.27936	2.94018	3.09606	0.470697	low
GSM1820892	2.26027	0	3.81527	2.40804	3.42437	3.05311	0.954266	high
GSM1820894	1.0137	0	3.54958	2.73274	2.91875	3.2773	1.15315	high
GSM1820895	1.53151	0	3.70153	3.02554	1.57661	2.59743	0.0735171	low
GSM1820898	0.813699	1	3.84591	2.79521	3.27756	3.51182	6.09092	high
GSM1820902	0.838356	1	3.78547	2.97074	3.15985	3.18167	2.47581	high
GSM1820903	2.84384	1	3.71022	2.95316	2.91899	2.99951	0.958062	high
GSM1820904	2.45205	0	3.61578	2.7705	2.8528	3.06733	0.689006	low
GSM1820905	4.91233	0	3.3039	2.72401	2.72099	3.10737	0.373929	low
GSM1820906	1.05205	0	3.64261	2.76253	3.29629	3.20044	1.71833	high
GSM1820907	1.15068	0	3.93186	1.73899	3.15198	3.36366	0.697164	low
GSM1820908	4.08493	0	3.77601	1.64903	3.05662	3.39881	0.465411	low
GSM1820909	0.646575	1	3.73453	2.49684	3.33324	3.38969	2.32671	high
GSM1820912	1.99452	1	3.50318	2.47168	3.39465	3.75322	4.7332	high
GSM1820914	2.5726	0	3.11326	1.58911	1.77105	3.22764	0.0208414	low
GSM1820739	8.01644	0	3.742	2.60632	2.89938	3.07464	0.694159	low
GSM1820741	1.52603	1	3.78399	2.76214	2.97953	3.18581	1.44987	high
GSM1820742	0.413699	1	3.68861	2.87515	3.44384	3.6441	9.53362	high
GSM1820747	1.5726	1	3.75092	2.27537	2.65913	2.8552	0.165124	low
GSM1820748	0.542466	1	3.39575	2.44845	2.87292	3.24831	0.492428	low
GSM1820750	2.69041	1	3.7745	2.30634	2.79223	2.84244	0.20189	low
GSM1820751	3.48493	1	3.41493	2.67437	2.56695	2.99529	0.250523	low
GSM1820752	5.89589	0	3.73254	1.83613	2.29084	3.0752	0.097701	low
GSM1820755	0.265753	1	3.97215	1.85654	2.92242	3.00809	0.248377	low
GSM1820758	1.69863	1	3.26077	1.79078	2.97188	3.01377	0.0759906	low
GSM1820759	5.38356	0	3.58137	3.78206	2.94091	2.96971	2.85438	high
GSM1820761	1.02192	1	3.62672	2.72838	3.19863	3.46959	3.10214	high
GSM1820767	4.0411	1	3.83852	2.8031	2.90656	3.24628	1.8602	high
GSM1820768	4.84658	1	3.82431	2.4566	3.1213	3.33215	1.67972	high
GSM1820769	0.758904	1	3.61972	2.81244	3.2924	3.52352	4.57511	high
GSM1820771	4.96712	0	3.16401	2.64897	2.37951	2.987	0.12681	low
GSM1820773	2.47945	1	3.52761	2.74075	3.12054	2.99195	0.617124	low
GSM1820775	4.32877	0	3.67426	2.48991	3.08009	3.20521	0.919598	high
GSM1820777	2.89041	1	3.56225	2.27832	2.68692	2.85066	0.124582	low
GSM1820780	2.66027	0	3.41852	2.54565	2.55078	3.06621	0.246114	low
GSM1820782	1.46575	1	3.54387	2.39086	2.20971	2.93269	0.108176	low
GSM1820783	0.161644	1	3.59801	3.15036	3.48445	3.42994	7.2722	high
GSM1820785	1.91233	0	3.55318	2.52088	3.10972	3.2561	0.953776	high
GSM1820790	1.67945	0	3.66505	2.1574	2.82985	3.0077	0.223327	low
GSM1820791	1.6274	0	3.89811	2.47298	2.83976	2.98312	0.514383	low
GSM1820794	1.54795	1	3.68241	3.04486	3.14744	3.29149	3.21274	high
GSM1820795	0.410959	1	3.82688	3.16012	3.44193	3.39167	9.12186	high
GSM1820799	1.33973	1	3.94268	3.25728	3.32821	3.39623	11.5079	high
GSM1820804	1.28219	0	3.3729	2.52324	2.58957	2.91114	0.146686	low
GSM1820805	2.30137	1	3.78272	2.67423	2.57301	3.17095	0.760583	low
GSM1820806	0.539726	1	3.59324	2.76324	3.42331	3.43253	3.59456	high
GSM1820808	2.38904	0	3.61375	2.78389	3.09796	3.2786	1.70692	high
GSM1820816	2.36438	0	3.35526	2.49894	2.68282	3.21808	0.370968	low
GSM1820819	3.20822	1	3.74618	2.64833	2.63799	3.11733	0.63245	low
GSM1820822	0.380822	1	3.65676	2.54106	3.0939	3.37338	1.60962	high
GSM1820824	0.805479	1	3.42396	3.09959	3.01577	3.43357	3.01944	high
GSM1820826	0.871233	1	3.59916	2.60317	3.13559	3.31083	1.41914	high
GSM1820830	0.756164	1	3.59412	2.70304	3.40419	3.51826	4.09416	high
GSM1820831	0.216438	1	3.93622	2.74278	3.24378	3.4061	4.57898	high
GSM1820832	2.8137	0	3.48344	2.44673	2.60426	2.98961	0.197445	low
GSM1820840	2.00274	1	3.60417	2.50859	3.00609	3.32265	1.09636	high
GSM1820842	1.33425	0	3.32438	2.45556	2.97807	3.23914	0.486395	low
GSM1820844	0.772603	1	2.69769	2.92338	3.38213	3.53839	1.43095	high
GSM1820845	1.25753	0	3.5821	2.61318	2.6193	3.06161	0.381521	low
GSM1820846	1.16712	1	3.71399	1.68961	3.01668	3.0436	0.153364	low
GSM1820848	1.04932	0	3.5882	1.87874	3.20448	3.32242	0.473858	low
GSM1820849	1.01096	1	3.5958	2.21866	2.81654	2.90419	0.161078	low
GSM1820852	1.60822	0	3.65956	2.42858	3.0589	3.05024	0.505485	low
GSM1820867	1.91507	0	3.93378	2.59135	3.04567	3.32048	2.22116	high
GSM1820870	1.90959	0	3.73398	2.71502	2.95323	2.99253	0.685478	low
GSM1820872	3.81918	1	3.79357	2.74052	3.37598	3.26941	2.82509	high
GSM1820873	3.94247	0	3.49667	2.74744	2.6314	2.97681	0.328337	low
GSM1820874	1.74521	1	3.60776	2.54913	2.88477	3.04349	0.457238	low
GSM1820878	1.03288	0	2.23708	2.76772	3.15317	3.48735	0.351448	low
GSM1820879	1.49589	0	3.80639	2.99734	3.17921	3.4764	6.43632	high
GSM1820880	2.07671	0	3.73653	2.84568	2.97432	3.08496	1.14259	high
GSM1820881	1.48219	1	3.82961	2.90903	2.87683	3.06802	1.2575	high
GSM1820882	0.254795	1	2.39526	2.87606	3.29734	3.39522	0.487486	low
GSM1820885	1.82192	0	3.40213	2.24115	2.58325	3.17139	0.204599	low
GSM1820887	0.60274	1	3.24415	2.51165	3.24868	3.51606	1.4185	high
GSM1820891	0.693151	1	3.51475	2.8063	2.88607	3.24724	1.08672	high
GSM1820893	1.06575	0	3.52871	3.07542	2.74573	3.07896	0.906375	high
GSM1820896	1.5726	0	3.23588	3.0159	3.11058	3.2534	1.27998	high
GSM1820897	3.84932	0	2.28423	2.40287	3.02511	3.30475	0.106149	low
GSM1820899	0.665753	0	3.72958	2.59024	2.95455	2.99591	0.560785	low
GSM1820900	0.652055	0	3.7483	2.81023	2.34893	2.92361	0.341143	low
GSM1820901	0.649315	0	3.55586	2.68619	2.65082	2.91935	0.282539	low
GSM1820910	3.00822	0	3.83491	1.21036	3.18706	3.26065	0.192898	low
GSM1820911	0.931507	1	3.58781	2.42723	3.04194	3.19359	0.668428	low
GSM1820913	0.364384	1	3.47336	2.55398	3.45955	3.75977	5.65991	high
