# Supplementary material for: A Comprehensive Study on Molecular Characteristics and Clinical Prognosis of Immune- Related Genes in Idiopathic Pulmonary Fibrosis
Source: Research Square preprint supplement (doi:10.21203/rs.3.rs-7616111/v1), 2025-10-30
Supplement: Supplementary file 10 [file c437794b5e5bb1486ac9d74a.xlsx]

## Sheet: Sheet1
ID	geneCluster
GSM1820739	A
GSM1820740	A
GSM1820741	A
GSM1820742	B
GSM1820743	A
GSM1820744	A
GSM1820745	A
GSM1820746	A
GSM1820747	A
GSM1820748	A
GSM1820749	A
GSM1820750	A
GSM1820751	A
GSM1820752	A
GSM1820753	A
GSM1820754	A
GSM1820755	A
GSM1820756	B
GSM1820757	A
GSM1820758	A
GSM1820759	A
GSM1820760	A
GSM1820761	B
GSM1820762	B
GSM1820763	A
GSM1820764	B
GSM1820765	B
GSM1820766	A
GSM1820767	B
GSM1820768	A
GSM1820769	B
GSM1820770	A
GSM1820771	A
GSM1820772	B
GSM1820773	A
GSM1820774	B
GSM1820775	A
GSM1820776	A
GSM1820777	A
GSM1820778	B
GSM1820779	A
GSM1820780	A
GSM1820781	B
GSM1820782	A
GSM1820783	B
GSM1820784	B
GSM1820785	A
GSM1820786	B
GSM1820787	A
GSM1820788	B
GSM1820789	A
GSM1820790	A
GSM1820791	A
GSM1820792	B
GSM1820793	B
GSM1820794	B
GSM1820795	B
GSM1820796	A
GSM1820797	A
GSM1820798	B
GSM1820799	B
GSM1820800	B
GSM1820801	B
GSM1820802	A
GSM1820803	B
GSM1820804	A
GSM1820805	A
GSM1820806	B
GSM1820807	B
GSM1820808	B
GSM1820809	B
GSM1820810	A
GSM1820811	A
GSM1820812	A
GSM1820813	B
GSM1820814	A
GSM1820815	A
GSM1820816	A
GSM1820817	B
GSM1820818	A
GSM1820819	A
GSM1820820	B
GSM1820821	B
GSM1820822	B
GSM1820823	A
GSM1820824	A
GSM1820825	B
GSM1820826	B
GSM1820827	A
GSM1820828	A
GSM1820829	B
GSM1820830	B
GSM1820831	B
GSM1820832	A
GSM1820833	B
GSM1820834	A
GSM1820835	A
GSM1820836	A
GSM1820837	A
GSM1820838	A
GSM1820839	B
GSM1820840	B
GSM1820841	A
GSM1820842	B
GSM1820843	A
GSM1820844	B
GSM1820845	A
GSM1820846	A
GSM1820847	A
GSM1820848	A
GSM1820849	A
GSM1820850	B
GSM1820851	A
GSM1820852	A
GSM1820853	B
GSM1820854	A
GSM1820855	B
GSM1820856	A
GSM1820857	A
GSM1820858	A
GSM1820859	A
GSM1820860	A
GSM1820861	B
GSM1820862	A
GSM1820863	B
GSM1820864	B
GSM1820865	A
GSM1820866	A
GSM1820867	A
GSM1820868	A
GSM1820869	A
GSM1820870	A
GSM1820871	B
GSM1820872	B
GSM1820873	A
GSM1820874	A
GSM1820875	A
GSM1820876	A
GSM1820877	B
GSM1820878	B
GSM1820879	B
GSM1820880	A
GSM1820881	A
GSM1820882	B
GSM1820883	B
GSM1820884	A
GSM1820885	A
GSM1820886	A
GSM1820887	B
GSM1820888	A
GSM1820889	A
GSM1820890	A
GSM1820891	B
GSM1820892	B
GSM1820893	A
GSM1820894	B
GSM1820895	A
GSM1820896	B
GSM1820897	B
GSM1820898	B
GSM1820899	A
GSM1820900	A
GSM1820901	A
GSM1820902	B
GSM1820903	A
GSM1820904	A
GSM1820905	A
GSM1820906	A
GSM1820907	B
GSM1820908	A
GSM1820909	B
GSM1820910	A
GSM1820911	B
GSM1820912	B
GSM1820913	B
GSM1820914	A
