# Supplementary material for: A Comprehensive Study on Molecular Characteristics and Clinical Prognosis of Immune- Related Genes in Idiopathic Pulmonary Fibrosis
Source: Research Square preprint supplement (doi:10.21203/rs.3.rs-7616111/v1), 2025-10-30
Supplement: Supplementary file 11 [file cbc6349e8b2077c6e12b1f79.xlsx]

## Sheet: Sheet1
ID	futime	fustat
GSM1820851	1443	1
GSM1820852	587	0
GSM1820853	214	1
GSM1820854	362	0
GSM1820855	468	1
GSM1820856	676	1
GSM1820857	1422	0
GSM1820858	1472	1
GSM1820859	433	0
GSM1820860	1271	0
GSM1820861	1281	1
GSM1820862	699	0
GSM1820863	351	1
GSM1820864	328	0
GSM1820865	529	0
GSM1820866	846	0
GSM1820867	699	0
GSM1820868	419	0
GSM1820869	1253	0
GSM1820870	697	0
GSM1820871	1240	0
GSM1820872	1394	1
GSM1820873	1439	0
GSM1820874	637	1
GSM1820875	918	0
GSM1820876	1817	0
GSM1820877	299	1
GSM1820878	377	0
GSM1820879	546	0
GSM1820880	758	0
GSM1820881	541	1
GSM1820882	93	1
GSM1820883	902	0
GSM1820884	395	1
GSM1820885	665	0
GSM1820886	1246	0
GSM1820887	220	1
GSM1820888	214	1
GSM1820889	348	0
GSM1820890	200	1
GSM1820891	253	1
GSM1820892	825	0
GSM1820893	389	0
GSM1820894	370	0
GSM1820895	559	0
GSM1820896	574	0
GSM1820897	1405	0
GSM1820898	297	1
GSM1820899	243	0
GSM1820900	238	0
GSM1820901	237	0
GSM1820902	306	1
GSM1820903	1038	1
GSM1820904	895	0
GSM1820905	1793	0
GSM1820906	384	0
GSM1820907	420	0
GSM1820908	1491	0
GSM1820909	236	1
GSM1820910	1098	0
GSM1820911	340	1
GSM1820912	728	1
GSM1820913	133	1
GSM1820914	939	0
GSM1820739	2926	0
GSM1820740	305	1
GSM1820741	557	1
GSM1820742	151	1
GSM1820743	1404	1
GSM1820744	718	1
GSM1820745	167	1
GSM1820746	1054	1
GSM1820747	574	1
GSM1820748	198	1
GSM1820749	1081	1
GSM1820750	982	1
GSM1820751	1272	1
GSM1820752	2152	0
GSM1820753	811	1
GSM1820754	2498	0
GSM1820755	97	1
GSM1820756	82	1
GSM1820757	824	1
GSM1820758	620	1
GSM1820759	1965	0
GSM1820760	2237	0
GSM1820761	373	1
GSM1820762	933	1
GSM1820763	1993	0
GSM1820764	1176	1
GSM1820765	221	1
GSM1820766	975	1
GSM1820767	1475	1
GSM1820768	1769	1
GSM1820769	277	1
GSM1820770	1140	1
GSM1820771	1813	0
GSM1820772	432	1
GSM1820773	905	1
GSM1820774	893	1
GSM1820775	1580	0
GSM1820776	1461	0
GSM1820777	1055	1
GSM1820778	45	1
GSM1820779	547	1
GSM1820780	971	0
GSM1820781	599	1
GSM1820782	535	1
GSM1820783	59	1
GSM1820784	210	1
GSM1820785	698	0
GSM1820786	226	1
GSM1820787	670	0
GSM1820788	98	1
GSM1820789	636	0
GSM1820790	613	0
GSM1820791	594	0
GSM1820792	306	1
GSM1820793	80	1
GSM1820794	565	1
GSM1820795	150	1
GSM1820796	523	0
GSM1820797	839	0
GSM1820798	66	1
GSM1820799	489	1
GSM1820800	21	1
GSM1820801	89	1
GSM1820802	551	0
GSM1820803	128	1
GSM1820804	468	0
GSM1820805	840	1
GSM1820806	197	1
GSM1820807	472	1
GSM1820808	872	0
GSM1820809	787	1
GSM1820810	1054	0
GSM1820811	1052	0
GSM1820812	378	1
GSM1820813	688	1
GSM1820814	493	1
GSM1820815	958	1
GSM1820816	863	0
GSM1820817	586	1
GSM1820818	1105	0
GSM1820819	1171	1
GSM1820820	110	1
GSM1820821	472	1
GSM1820822	139	1
GSM1820823	841	0
GSM1820824	294	1
GSM1820825	388	1
GSM1820826	318	1
GSM1820827	1104	0
GSM1820828	1097	0
GSM1820829	42	1
GSM1820830	276	1
GSM1820831	79	1
GSM1820832	1027	0
GSM1820833	557	1
GSM1820834	660	0
GSM1820835	144	1
GSM1820836	271	1
GSM1820837	619	0
GSM1820838	859	0
GSM1820839	583	0
GSM1820840	731	1
GSM1820841	549	0
GSM1820842	487	0
GSM1820843	540	1
GSM1820844	282	1
GSM1820845	459	0
GSM1820846	426	1
GSM1820847	401	1
GSM1820848	383	0
GSM1820849	369	1
GSM1820850	244	1
